# Supplementary material for: Chalcone–sulfonate ester derivatives as dual urease and α-amylase inhibitors: synthesis, biological evaluation and integrated computational studies
Source: Royal Society of Chemistry journal article supplement (doi:10.1039/d6ra02588a), 2026-05-22

## **Supplementary Information File**

### **1. Methodology**

#### **1.1. *In Silico* Investigations**

##### **1.1.1. SwissADME**

The SwissADME online tool was used to determine the pharmacokinetic properties of the synthesized compounds. It is a platform offering a thorough evaluation of absorption, distribution, metabolism and excretion (ADME) parameters in accordance with the molecular structure of compounds. Molecular drawing software was first used to draw the chemical structures of the chalcone sulfonate esters synthesized and convert the structure into canonical SMILES format. This was followed by submission to the SwissADME server to be evaluated computationally using these SMILES. SwissADME computes a number of physicochemical and pharmacokinetic descriptors of a substance such as molecular weight, lipophilicity (LogP), hydrogen bond donors and acceptors, topological polar surface area (TPSA), gastrointestinal (GI) absorption, blood-brain barrier (BBB) permeability, water solubility, and drug-likeness based on a given set of rules that include Lipinski, Ghose, Veber, Egan, and Muegge filters. Passive gastrointestinal absorption and brain penetration were also predicted with the use of the BOILED-Egg model that is present in SwissADME. The comparison of ADME profiles of the synthesized compounds with two reference drugs, Thiourea and Acarbose were used to determine their pharmacokinetic suitability<sup>1</sup>.

##### **1.1.2. Molecular docking**

###### **1.1.2.1. Protein Selection and Protein Preparation**

In the case of molecular docking analysis, two enzymes related to metabolic and pathogenic activities were chosen: urease and  $\alpha$ -amylase. Urease is a major virulence factor that is involved in the hydrolysis of urea and is highly implicated in gastric and urinary tract infections, whereas

$\alpha$ -amylase is a major enzyme in carbohydrate metabolism and is also a highly targeted enzyme in the management of diabetes mellitus. These proteins had their three-dimensional crystal structures obtained at the Protein Data Bank (PDB). In the case of urease, 1OTH and 2ZAV were selected as the protein structures, and 1SMD and 5U3A were selected in the case of alpha amylase. The proteins of choice had high resolution and clearly defined active sites, which could be used in docking experiments. Table 1 contains the information about the chosen proteins, their PDB code, resolution, and their natural source in detail. Protein structures were made ready through Molegro Virtual Docker (MVD) before docking. The protein structures were washed with all co-crystallized ligands, water molecules and other non-essential heteroatoms to avoid interference with the ligand binding. Stabilization of the protein structure by polar hydrogen atoms was done, and the bond orders were given. The minimization of energy of the protein structures was done in order to eliminate steric clashes and ensure the geometry of the active site residues is optimized. The ready proteins were then stored in the right format for docking simulations <sup>2</sup>.

### **2.3.2.2. Ligand Preparation**

The ligands (synthesized chalcone sulfonate esters, compounds **1-7**) and template drugs (thiourea urease inhibitor) and acarbose ( $\alpha$ -amylase inhibitor) were applied to the docking study. The molecular modeling software and three-dimensional conformations of the synthesized compounds were obtained by drawing the chemical structures of the compounds. Optimization of the geometries of the ligands was done to produce conformers that were stable before docking. Hydrogen atoms were incorporated in order to make the valence and molecular geometry right. Every ligand was then minimized in terms of energy to get the lowest energy conformations to be used in docking simulations. The ligands were prepared and then exported to Molegro Virtual Docker to be analyzed by docking <sup>3</sup>.

### **2.3.2.3. Molecular Docking Assay**

The simulations of the molecular docking were conducted with Molegro Virtual Docker (MVD) to determine the binding interactions between the synthesized chalcone sulfonate ester derivatives and the chosen target proteins. The docking protocol was created to come up with the optimal binding orientations of the ligands in the active sites of the enzymes. To begin with, the ready protein structures were loaded into the Molegro Virtual Docker workspace. The binding sites of each protein were determined using the cavity detection algorithm applied to the MVD, which identifies potential ligand-binding pockets based on the protein surface topology. Docking was performed in the cavity with the highest volume and the most relevance to the catalytic site <sup>4</sup>. Prediction of the ligand conformation within the binding site was performed using the MolDock optimizer, which employs a guided differential evolution algorithm during the docking process. The MolDock scoring feature was used to approximate the binding affinity of each ligand for the target proteins. The ligands were free to undergo conformational changes to take up different orientations and positions in the active site cavity in the docking process. The ligands were docked repeatedly to have consistent and reliable results. The poses generated by docking were ranked by MolDock score, and lower energy values corresponded to good binding interactions. Based on the lowest binding energy and the highest affinity of the key amino acids that were observed in the active site, the optimal docking geometry of each ligand-protein complex was selected <sup>5</sup>.

**Table S1:** Selection of Urease and  $\alpha$ -Amylase protein structures used for molecular docking

| S. No. | Enzyme System                         | Selected Protein Target          | PDB ID      | Resolution (Å) | Reference |
|--------|---------------------------------------|----------------------------------|-------------|----------------|-----------|
| 1      | Urea Metabolism<br>(Human Urea Cycle) | Ornithine<br>Transcarbamylase    | <b>1OTH</b> | 2.05           | 6         |
| 2      | Urea Metabolism<br>(Human Urea Cycle) | Arginase I                       | <b>2ZAV</b> | 1.55           | 7         |
| 3      | Carbohydrate<br>Metabolism            | Salivary $\alpha$ -<br>Amylase   | <b>1SMD</b> | 1.80           | 8         |
| 4      | Carbohydrate<br>Metabolism            | Pancreatic $\alpha$ -<br>Amylase | <b>5U3A</b> | 1.65           | 9         |

#### 2.3.2.4. Visualization

Three-dimensional structures showed scientists the spatial orientation of ligands in the active binding site, while two-dimensional interaction diagrams displayed the specific hydrogen bonds, hydrophobic interactions,  $\pi$ - $\pi$  interactions, and van der Waals contacts which ligands established with amino acid residues of the target proteins <sup>10</sup>.

#### 2.3.2.5. Validation of Docking

To confirm the correctness and reliability of the molecular docking protocol employed in the present paper, a redocking experiment was conducted. Redocking is the conventional validation technique whereby the co-crystallized ligand within the protein crystal structure is removed and re-docked into the same binding cavity. The resultant predicted docking pose is compared to the experimentally obtained ligand conformation of the crystal structure. Root Mean Square Deviation (RMSD) is used to measure the similarity of these two poses. In the current research, redocking validation of the identified target proteins to be utilized in the docking experiment [the urease proteins 1OTH and 2ZAV, the alpha-amylase proteins 1SMD and 5U3A] was performed, and the redocking results were obtained in the Protein Data Bank

(PDB). The native ligands of the proteins were then re-docked into their active sites under the same docking parameters used for the synthesized chalcone sulfonate esters. To measure the accuracy of the docking protocol, the Root Mean Square Deviation (RMSD) between the redocked and crystallographic ligand poses was determined. RMSD is used to evaluate the mean distance between atoms of the two conformations. An RMSD value of less than 2.0 Å is usually accepted in molecular docking validation studies and indicates that the docking protocol reproduces the experimental binding mode correctly <sup>11</sup>.

#### **2.4. MD Simulation**

To further analyze the stability and dynamic behavior of the most promising protein-ligand complexes identified as a result of docking studies of chalcone sulfonate esters, the MD simulations were conducted on the WebGRO platform. WebGRO is an online interface to the popular molecular simulation program GROMACS, through which it is possible to efficiently simulate biomolecular systems using MD. The protein-ligand complexes that were used in the MD simulations included Compound **7** with 2ZAV and compound **5** with 5U3A, since the complexes had good docking interactions and binding affinities. The uploaded complexes were docked into the WebGRO server to simulate them. In the process of system preparation, the GROMOS96 43a1 force field was used to model the molecular interactions of the protein with the topology of the ligand being created automatically by the server. The solvation of the ligands was carried out in a cubic simulation box saturated with SPC water molecules, with a distance of at least 1.0 nm between the protein surface and the box boundary to ensure sufficient solvation. In order to ensure neutrality of the system, it was neutralized with corresponding counter ions (Na<sup>+</sup> or Cl<sup>-</sup>) <sup>12</sup>.

The steepest descent algorithm was used to minimize energy to remove steric clashes and bad contacts in the system. The system was equilibrated under two ensembles after the system had been minimized in terms of energy. To stabilize the temperature of the system at 300 K, NVT

(volume, temperature, fixed number of particles) equilibration was done. This was then followed by equilibration of NPT (number of particles, pressure, and temperature constant), to stabilize pressure at 1 bar to enable the system density to equilibrate adequately. A 25 ns production MD simulation of each of the protein-ligand complexes was conducted after successful equilibration. During the simulation, periodicity was used in three dimensions. The simulation results were then studied to assess stability in structure and behavior of interactions based on some parameters, including root mean square deviation (RMSD), root mean square fluctuation (RMSF), radius of gyration (Rg), hydrogen bond formation, and the solvent accessible surface area (SASA). These parameters will give information on the conformational stability, flexibility, compactness, persistence of interactions and the solvent exposure of the protein-ligand complexes <sup>13</sup>.

## **2.5. Density functional theory (DFT)**

All quantum chemical calculations were performed using the Gaussian 09 computational chemistry package. Initially, the molecular structures of the selected lead compounds were constructed and prepared in their molecular form. Geometry optimization was carried out using the DFT method with the 6-311G basis set and the B3LYP functional. This level of theory is widely applied for investigating the electronic properties and structural stability of organic molecules because it provides a suitable balance between computational efficiency and accuracy <sup>14</sup>. The optimization process for geometry allowed molecules to reach their most stable states because no symmetry constraints were used during the process. The absence of imaginary frequencies in the vibrational analysis proved that the optimized structures remained stable. The optimization process produced calculations for multiple electronic parameters, which included the highest occupied molecular orbital (HOMO) and lowest unoccupied molecular orbital (LUMO) energy values, along with energy gap ( $\Delta E$ ) and global reactivity descriptors and molecular electrostatic potential (MEP) of the system <sup>15</sup>. The frontier molecular

orbital (FMO) analysis assessed how the molecules donated and accepted electrons. The study derived global reactivity descriptors, which included ionization potential (I), electron affinity (A), chemical hardness ( $\eta$ ), chemical softness (S), chemical potential ( $\mu$ ) and electrophilicity index ( $\omega$ ) from the HOMO and LUMO energies based on Koopmans' theorem. The generation of molecular electrostatic potential maps enabled the detection of electrophilic and nucleophilic reactive areas present in the molecules.

Multiwfn software tools were used to study electron sharing between atoms and their non-bonding interactions<sup>16</sup>. The wavefunction data obtained from the DFT calculations were converted into formatted checkpoint (.fchk) files and used as input for wavefunction analysis. Electron localization characteristics were investigated through Electron Localization Function (ELF) and Localized Orbital Locator (LOL) analyses, while weak intermolecular interactions were examined using Reduced Density Gradient (RDG) and Non-Covalent Interaction (NCI) analyses. RDG scatter plots and NCI surfaces were generated to identify attractive interactions, van der Waals forces, and steric repulsion within the studied compounds<sup>17</sup>.

## References

1. M. Guerfi, M. Berredjem, A. Dekir, R. Bahadi, S.-E. Djouad, T. O. Sothea, R. Redjemia, B. Belhani and M. Boussaker, *Molecular Diversity*, 2024, **28**, 1023-1038.
2. M. A. Mp, C. P. Somaiya, P. K. Singhal, A. K. Nigam, A. Mukherjee and K. P. Baalann10, *Tuijin Jishu/Journal of Propulsion Technology*, 2023, **44**, 2023.
3. D. S. Megawati, J. Ekowati and S. Siswodihardjo, *Letters in Drug Design & Discovery*, 2024, **21**, 3913-3922.
4. J. Monga, N. S. Ghosh, S. Kamboj and M. Mukhija, *Journal of Molecular Chemistry*, 2023, **3**, 590-590.
5. R. Gupta, A. Raza, S. K. Singh, J. Kaur and P. Wadhwa, *Current Signal Transduction Therapy*, 2025, **20**, E15743624305290.

6. D. Shi, H. Morizono, Y. Ha, M. Aoyagi, M. Tuchman and N. M. Allewell, *Journal of Biological Chemistry*, 1998, **273**, 34247-34254.
7. L. Di Costanzo, M. E. Pique and D. W. Christianson, *Journal of the American Chemical Society*, 2007, **129**, 6388-6389.
8. N. Ramasubbu, V. Paloth, Y. Luo, G. D. Brayer and M. J. Levine, *Biological Crystallography*, 1996, **52**, 435-446.
9. L. Goldbach, B. J. Vermeulen, S. Caner, M. Liu, C. Tysoe, L. van Gijzel, R. Yoshisada, M. Trellet, H. van Ingen and G. D. Brayer, *ACS chemical biology*, 2019, **14**, 1751-1759.
10. A. T. Agustin, A. I. Muflihah, A. F. Wijaya, H. Mufidah and J. Riranto.
11. A. D. Savitri, H. B. Hidayati, L. Veterini, M. S. Widyaswari, A. R. Muhammad, A. Fairus, M. Q. B. Zulfikar, M. Astri, N. A. Ramasima and D. P. Anggraeni, *JJBS: Jordan Journal of Biological Sciences*, 2023, **16**, 7-12.
12. S. Karakkadparambil Sankaran and A. S. Nair, *Journal of Biomolecular Structure and Dynamics*, 2023, **41**, 6459-6475.
13. M. Hussain, N. Kanwal, A. Jahangir, N. Ali, N. Hanif and O. Ullah, *Frontiers in Chemistry*, 2024, **12**, 1493165.
14. K. Gören, E. Çimen, V. Tahiroğlu and Ü. Yıldiko, *Bitlis Eren Üniversitesi Fen Bilimleri Dergisi*, 2024, **13**, 659-672.
15. N. Karakuş, *Cumhuriyet Science Journal*, 2024, **45**, 282-290.
16. K. Arulaabaranam, S. Muthu, G. Mani and A. B. Geoffrey, *Heliyon*, 2021, **7**.
17. F. Akman, A. Demirpolat, A. S. Kazachenko, A. S. Kazachenko, N. Issaoui and O. Al-Dossary, *Molecules*, 2023, **28**, 2684.

## 2. Results and Discussion

### 2.1. ADME Studies

**Table S2:** SwissADME-predicted properties of synthesized compounds (1-7)

| Compounds                         | 1      | 2      | 3         | 4         | 5      | 6         | 7      |
|-----------------------------------|--------|--------|-----------|-----------|--------|-----------|--------|
| <b>Physicochemical properties</b> |        |        |           |           |        |           |        |
| <b>MW</b>                         | 406.49 | 443.31 | 394.44    | 398.86    | 414.47 | 398.86    | 409.41 |
| <b>#Heavy atoms</b>               | 29     | 27     | 28        | 27        | 30     | 27        | 29     |
| <b>#Aromatic heavy atoms</b>      | 18     | 18     | 18        | 18        | 22     | 18        | 18     |
| <b>Fraction Csp3</b>              | 0.12   | 0      | 0.05      | 0         | 0      | 0         | 0      |
| <b>#Rotatable bonds</b>           | 6      | 6      | 7         | 6         | 6      | 6         | 7      |
| <b>#H-bond acceptors</b>          | 4      | 4      | 5         | 4         | 4      | 4         | 6      |
| <b>#H-bond donors</b>             | 0      | 0      | 0         | 0         | 0      | 0         | 0      |
| <b>MR</b>                         | 115.45 | 108.25 | 107.04    | 105.56    | 118.05 | 105.56    | 109.37 |
| <b>TPSA</b>                       | 68.82  | 68.82  | 78.05     | 68.82     | 68.82  | 68.82     | 114.64 |
| <b>Lipophilicity</b>              |        |        |           |           |        |           |        |
| <b>iLOGP</b>                      | 3.79   | 3.57   | 3.23      | 3.46      | 3.22   | 2.79      | 2.71   |
| <b>XLOGP3</b>                     | 5.88   | 5.48   | 4.76      | 5.42      | 6.04   | 5.42      | 4.62   |
| <b>WLOGP</b>                      | 6.25   | 6.08   | 5.33      | 5.98      | 6.48   | 5.98      | 5.23   |
| <b>MLOGP</b>                      | 4.64   | 4.59   | 3.65      | 4.48      | 4.67   | 4.48      | 3.03   |
| <b>Silicos-IT Log P</b>           | 5.5    | 4.59   | 3.98      | 4.56      | 4.96   | 4.56      | 1.76   |
| <b>Consensus Log P</b>            | 5.21   | 4.86   | 4.19      | 4.78      | 5.07   | 4.64      | 3.47   |
| <b>Water solubility</b>           |        |        |           |           |        |           |        |
| <b>ESOL Log S</b>                 | -6.13  | -6.14  | -5.3      | -5.82     | -6.36  | -5.82     | -5.29  |
| <b>ESOL Class</b>                 | Poorly | Poorly | Moderatel | Moderatel | Poorly | Moderatel | Moder  |

|                                 | soluble | soluble | y soluble | y soluble | soluble | y soluble | ately soluble |
|---------------------------------|---------|---------|-----------|-----------|---------|-----------|---------------|
| <b>Pharmacokinetics</b>         |         |         |           |           |         |           |               |
| <b>GI absorption</b>            | High    | High    | High      | High      | High    | High      | Low           |
| <b>BBB permeant</b>             | No      | No      | No        | No        | No      | No        | No            |
| <b>Pgp substrate</b>            | Yes     | Yes     | No        | Yes       | Yes     | Yes       | Yes           |
| <b>CYP1A2 inhibitor</b>         | Yes     | Yes     | No        | Yes       | No      | Yes       | Yes           |
| <b>CYP2C19 inhibitor</b>        | Yes     | Yes     | Yes       | Yes       | Yes     | Yes       | Yes           |
| <b>CYP2C9 inhibitor</b>         | Yes     | Yes     | Yes       | Yes       | No      | Yes       | Yes           |
| <b>CYP2D6 inhibitor</b>         | No      | No      | No        | No        | No      | No        | No            |
| <b>CYP3A4 inhibitor</b>         | No      | No      | No        | No        | No      | No        | No            |
| <b>log Kp (cm/s)</b>            | -4.6    | -5.11   | -5.33     | -4.88     | -4.54   | -4.88     | -5.52         |
| <b>Drug-likeness</b>            |         |         |           |           |         |           |               |
| <b>Lipinski #violations</b>     | 1       | 1       | 0         | 1         | 1       | 1         | 0             |
| <b>Ghose #violations</b>        | 1       | 1       | 0         | 1         | 1       | 1         | 0             |
| <b>Veber #violations</b>        | 0       | 0       | 0         | 0         | 0       | 0         | 0             |
| <b>Egan #violations</b>         | 1       | 1       | 0         | 1         | 1       | 1         | 0             |
| <b>Muegge #violations</b>       | 1       | 1       | 0         | 1         | 1       | 1         | 0             |
| <b>Bioavailability Score</b>    | 0.55    | 0.55    | 0.55      | 0.55      | 0.55    | 0.55      | 0.55          |
| <b>Medicinal chemistry</b>      |         |         |           |           |         |           |               |
| <b>PAINS #alerts</b>            | 0       | 0       | 0         | 0         | 0       | 0         | 0             |
| <b>Brenk #alerts</b>            | 2       | 2       | 2         | 2         | 2       | 2         | 4             |
| <b>Leadlikeness #violations</b> | 2       | 2       | 2         | 2         | 2       | 2         | 2             |
| <b>Synthetic Accessibility</b>  | 3.84    | 3.46    | 3.52      | 3.44      | 3.67    | 3.45      | 3.52          |

## 2.2. Molecular Docking Studies

**Table S3:** Represented molecular docking interactions of Thiourea (reference drug) and synthesized compounds (**1-7**) against urease proteins (1OTH and 2ZAV)

| Compound | PDB ID      | Docking score | H-Bonds  | Protein-ligand interaction by H-bonding |              |          |                     | Protein-ligand interaction by hydrophobic interaction |              |             |                  |             |          |
|----------|-------------|---------------|----------|-----------------------------------------|--------------|----------|---------------------|-------------------------------------------------------|--------------|-------------|------------------|-------------|----------|
|          |             |               |          | Amino acid residue                      | Distance (Å) | Category | Type                | Amino acid residue                                    | Distance (Å) | Category    | Type             |             |          |
| <b>1</b> | <b>1OTH</b> | -130.668      | -1.19515 | ARG 270                                 | 2.39048      | H-Bond   | Conventional H-Bond | ASP165:C,O;                                           | 3.56002      | Hydrophobic | Amide-Pi Stacked |             |          |
|          |             |               |          | ASN 198                                 | 2.43418      | H-Bond   | C-H Bond            | LEU166:N                                              |              |             |                  |             |          |
|          |             |               |          | HIS 202                                 | 2.16974      | H-Bond   | C-H Bond            | LEU 166                                               | 3.88068      |             |                  | Hydrophobic | Alkyl    |
|          |             |               |          | SER 267                                 | 2.46563      | H-Bond   | C-H Bond            | HIS 202                                               | 4.34338      |             |                  | Hydrophobic | Pi-Alkyl |
|          |             |               |          |                                         |              |          |                     | ARG 270                                               | 5.4336       |             |                  | Hydrophobic | Pi-Alkyl |
|          |             |               |          |                                         |              |          |                     | LEU 166                                               | 4.85452      | Hydrophobic | Pi-Alkyl         |             |          |
| <b>2</b> |             | -128.498      | -1.20046 | ARG 270                                 | 2.36671      | H-Bond   | Conventional H-Bond | ASP165:C,O;                                           | 3.52563      | Hydrophobic | Amide-Pi Stacked |             |          |
|          |             |               |          | ASN 198                                 | 2.32601      | H-Bond   | C-H Bond            | LEU166:N                                              |              |             |                  |             |          |
|          |             |               |          | HIS 202                                 | 2.23048      | H-Bond   | C-H Bond            | ARG 270                                               | 5.48288      |             |                  | Hydrophobic | Pi-Alkyl |
|          |             |               |          | SER 267                                 | 2.35247      | H-Bond   | C-H Bond            | LEU 166                                               | 4.79882      |             |                  | Hydrophobic | Pi-Alkyl |
| <b>3</b> |             | -129.672      | -2.83477 | ARG 270                                 | 1.787        | H-Bond   | Conventional H-Bond | TYR 223                                               | 4.63895      | Hydrophobic | Pi-Pi            |             |          |
|          |             |               |          | ARG 277                                 | 2.43784      | H-Bond   | Conventional H Bond | LEU 163                                               | 4.69643      |             |                  | Hydrophobic | T-shaped |
|          |             |               |          | ASN 198                                 | 2.73475      | H-Bond   | C-H Bond            | MET 268                                               | 4.83924      |             |                  | Hydrophobic | Alkyl    |
|          |             |               |          | TYR 223                                 | 2.65692      | H-Bond   | C-H Bond            |                                                       |              |             |                  |             | Alkyl    |
|          |             |               |          | MET 268                                 | 2.75964      | H-Bond   | C-H Bond            |                                                       |              |             |                  |             |          |
| <b>4</b> |             | -122.404      | -1.51843 | ARG 270                                 | 1.81977      | H-Bond   | Conventional H-Bond | TYR 223                                               | 4.61099      | Hydrophobic | Pi-Pi T-shaped   |             |          |
|          |             |               |          | ARG 277                                 | 2.18071      | H-Bond   | Conventional H Bond | LEU 163                                               | 5.05453      |             |                  | Hydrophobic |          |
|          |             |               |          | ASN 198                                 | 2.83424      | H-Bond   | C-H Bond            | ARG 270                                               | 5.36322      |             |                  | Hydrophobic | Alkyl    |

|                 |             |          |         |         |        |                     |         |         |             |                |
|-----------------|-------------|----------|---------|---------|--------|---------------------|---------|---------|-------------|----------------|
|                 |             |          | TYR 223 | 2.51544 | H-Bond | C-H Bond            |         |         |             | Pi-Alkyl       |
| <b>5</b>        |             | -5.31263 | SER 267 | 2.3099  | H-Bond | Conventional H-Bond | LEU 163 | 2.2983  | Hydrophobic | Pi-Sigma       |
|                 |             |          | MET 268 | 1.9339  | H-Bond | Conventional H Bond | MET 268 | 4.64814 | Hydrophobic | Pi-Alkyl       |
|                 |             | -132.168 | SER 267 | 2.56005 | H-Bond | C-H Bond            | LEU 163 | 4.96282 | Hydrophobic | Pi-Alkyl       |
|                 |             |          | SER 267 | 2.74008 | H-Bond | C-H Bond            | CYS 303 | 4.34474 | Hydrophobic | Pi-Alkyl       |
|                 |             |          |         |         |        |                     | CYS 303 | 4.74069 | Hydrophobic | Pi-Alkyl       |
| <b>6</b>        |             | 0        | ARG 270 | 2.78414 | H-Bond | Conventional H-Bond |         |         |             |                |
|                 |             |          | LEU 166 | 2.6879  | H-Bond | C-H Bond            |         |         |             |                |
|                 |             | -121.812 | HIS 202 | 2.61808 | H-Bond | C-H Bond            |         |         |             |                |
|                 |             |          | TYR 223 | 3.04346 | H-Bond | C-H Bond            |         |         |             |                |
| <b>7</b>        |             |          | SER 267 | 2.41764 | H-Bond | Conventional H-Bond | ASN 198 | 2.63752 | Hydrophobic | Pi-Sigma       |
|                 |             |          | ARG 270 | 2.48966 | H-Bond | Conventional H-Bond | TYR 223 | 5.60402 | Hydrophobic | Pi-Pi T-shaped |
|                 |             |          | ARG 270 | 2.23418 | H-Bond | Conventional H-Bond |         |         |             |                |
|                 |             | -137.29  | ARG 270 | 2.78864 | H-Bond | Conventional H-Bond |         |         |             |                |
|                 |             | -2.8346  | ARG 277 | 2.65671 | H-Bond | Conventional H-Bond |         |         |             |                |
|                 |             |          | ARG 277 | 1.64243 | H-Bond | Conventional H-Bond |         |         |             |                |
|                 |             |          | SER 267 | 2.317   | H-Bond | C-H Bond            |         |         |             |                |
|                 |             |          | ARG 270 | 1.85238 | H-Bond | C-H Bond            |         |         |             |                |
| <b>Thiourea</b> |             | -4.25292 | GLY 197 | 2.27823 | H-Bond | Conventional H-Bond |         |         |             |                |
|                 |             | -67.354  | GLY 197 | 1.89746 | H-Bond | Conventional H-Bond |         |         |             |                |
|                 |             |          | GLU 224 | 2.07603 | H-Bond | Conventional H-Bond |         |         |             |                |
| <b>1</b>        | <b>2ZAV</b> | -3.21246 | LYS 68  | 2.50851 | H-Bond | Conventional H-Bond | ILE 166 | 2.88632 | Hydrophobic | Pi-Sigma       |
|                 |             |          | LYS 68  | 2.67146 | H-Bond | Conventional H-Bond | ILE 166 | 4.11953 | Hydrophobic | Alkyl          |
|                 |             | -147.842 | TYR 218 | 2.91728 | H-Bond | Conventional H-Bond | PRO 63  | 4.06094 | Hydrophobic | Alkyl          |
|                 |             |          | ARG 222 | 1.6318  | H-Bond | Conventional H-Bond | PRO 20  | 5.07391 | Hydrophobic | Pi-Alkyl       |
|                 |             |          | GLY 221 | 2.73233 | H-Bond | C-H Bond            | LYS 172 | 4.32373 | Hydrophobic | Pi-Alkyl       |
|                 |             |          | ASN 139 | 3.08877 | H-Bond | Pi-Donor C-H Bond   | ARG 222 | 4.19718 | Hydrophobic | Pi-Alkyl       |

|          |          |          |         |         |                     |                     |             |             |             |          |
|----------|----------|----------|---------|---------|---------------------|---------------------|-------------|-------------|-------------|----------|
| <b>2</b> | -2.5     | ASN 69   | 1.92623 | H-Bond  | Conventional H-Bond | LEU 206             | 2.8133      | Hydrophobic | Pi-Sigma    |          |
|          |          | LYS 68   | 2.79789 | H-Bond  | C-H Bond            | PHE 198             | 5.74606     | Hydrophobic | Pi-Pi       |          |
|          |          | LYS 196  | 2.25558 | H-Bond  | C-H Bond            | LYS 17              | 4.47372     | Hydrophobic | Stacked     |          |
|          |          | -140.214 | LYS 196 | 2.59289 | H-Bond              | C-H Bond            | PRO 63      | 5.43504     | Hydrophobic | Alkyl    |
|          |          |          |         |         |                     |                     | LYS 68      | 3.86481     | Hydrophobic | Pi-Alkyl |
|          |          |          |         |         | LYS 196             | 5.10692             | Hydrophobic | Pi-Alkyl    |             |          |
| <b>3</b> | -4.76894 | LYS 17   | 1.75441 | H-Bond  | Conventional H-Bond | GLN19:C,O;P         | 3.38145     | Hydrophobic | Amide-Pi    |          |
|          |          | LYS 68   | 2.41673 | H-Bond  | Conventional H-Bond | RO20:N              |             |             | Stacked     |          |
|          |          | TYR 218  | 2.27153 | H-Bond  | Conventional H-Bond | PRO 63              | 4.13909     | Hydrophobic | Alkyl       |          |
|          |          | -149.239 | LYS 17  | 2.61347 | H-Bond              | C-H-Bond            | PRO 20      | 4.10608     | Hydrophobic | Pi-Alkyl |
|          |          |          | LYS 196 | 2.75947 | H-Bond              | C-H Bond            | LYS 68      | 4.19662     | Hydrophobic | Pi-Alkyl |
|          |          |          | GLU 214 | 3.08627 | H-Bond              | C-H Bond            | LYS 68      | 3.97169     | Hydrophobic | Pi-Alkyl |
|          |          |          |         |         | LYS 196             | 5.00458             | Hydrophobic | Pi-Alkyl    |             |          |
| <b>4</b> | -3.79141 | LYS 68   | 1.91549 | H-Bond  | Conventional H-Bond | ARG 222             | 4.30123     | Hydrophobic | Pi-Alkyl    |          |
|          |          | -138.582 | LYS 223 | 2.07928 | H-Bond              | Conventional H-Bond | ILE 66      | 5.27691     | Hydrophobic | Pi-Alkyl |
|          |          |          |         |         |                     |                     | LYS 172     | 3.71678     | Hydrophobic | Pi-Alkyl |
| <b>5</b> | -2.5     | ASN 69   | 1.99771 | H-Bond  | Conventional H-Bond | LEU 206             | 2.81541     | Hydrophobic | Pi-Sigma    |          |
|          |          | LYS 68   | 2.77049 | H-Bond  | C-H-Bond            | PHE 198             | 5.70229     | Hydrophobic | Pi-Pi       |          |
|          |          | -154.429 | LYS 196 | 2.21364 | H-Bond              | C-H Bond            | LYS 68      | 3.92701     | Hydrophobic | Stacked  |
|          |          |          |         |         |                     |                     | LYS 196     | 5.03071     | Hydrophobic | Pi-Alkyl |
|          |          |          |         |         |                     |                     | LYS 17      | 5.08049     | Hydrophobic | Pi-Alkyl |
|          |          |          |         |         |                     |                     |             | Pi-Alkyl    |             |          |
| <b>6</b> | -6.61711 | LYS 17   | 2.08411 | H-Bond  | Conventional H-Bond | TYR 197             | 5.23934     | Hydrophobic | Pi-Pi       |          |
|          |          | ASN 69   | 1.62835 | H-Bond  | Conventional H-Bond | LYS 191             | 5.12792     | Hydrophobic | T-shaped    |          |
|          |          | -129.174 | TYR 197 | 1.804   | H-Bond              | Conventional H-Bond | PRO 20      | 4.88202     | Hydrophobic | Pi-Alkyl |
|          |          |          | LYS 196 | 2.77417 | H-Bond              | C-H Bond            | LYS 196     | 4.92511     | Hydrophobic | Pi-Alkyl |
|          |          |          |         |         |                     |                     |             | Pi-Alkyl    |             |          |

|                 |  |         |         |         |         |                     |                     |         |             |             |          |
|-----------------|--|---------|---------|---------|---------|---------------------|---------------------|---------|-------------|-------------|----------|
| 7               |  |         | LYS 17  | 2.69002 | H-Bond  | Conventional H-Bond | PRO 63              | 5.31858 | Hydrophobic | Pi-Alkyl    |          |
|                 |  |         | LYS 17  | 2.15443 | H-Bond  | Conventional H-Bond | PRO 20              | 4.85571 | Hydrophobic | Pi-Alkyl    |          |
|                 |  |         | LYS 17  | 2.33558 | H-Bond  | Conventional H-Bond | LYS 68              | 4.73572 | Hydrophobic | Pi-Alkyl    |          |
|                 |  | -171.22 | -8.6456 | ASN 69  | 2.43176 | H-Bond              | Conventional H-Bond | LYS 196 | 5.14516     | Hydrophobic | Pi-Alkyl |
|                 |  |         |         | ASN 69  | 1.81164 | H-Bond              | Conventional H-Bond | LYS 196 | 4.85213     | Hydrophobic | Pi-Alkyl |
|                 |  |         |         | LYS 191 | 2.42223 | H-Bond              | Conventional H-Bond |         |             |             |          |
|                 |  |         |         | LYS 68  | 2.72046 | H-Bond              | Conventional H-Bond |         |             |             |          |
|                 |  |         |         | GLY 194 | 2.64408 | H-Bond              | C-H Bond            |         |             |             |          |
| <b>Thiourea</b> |  |         | ILE 58  | 2.83724 | H-Bond  | Conventional H-Bond |                     |         |             |             |          |
|                 |  |         | SER 72  | 3.08641 | H-Bond  | Conventional H-Bond |                     |         |             |             |          |
|                 |  | -70.611 | -6.4032 | PHE 55  | 2.03755 | H-Bond              | Conventional H-Bond |         |             |             |          |
|                 |  |         |         | ASP 57  | 1.87507 | H-Bond              | Conventional H-Bond |         |             |             |          |
|                 |  |         |         | PHE 55  | 2.27528 | H-Bond              | Conventional H-Bond |         |             |             |          |

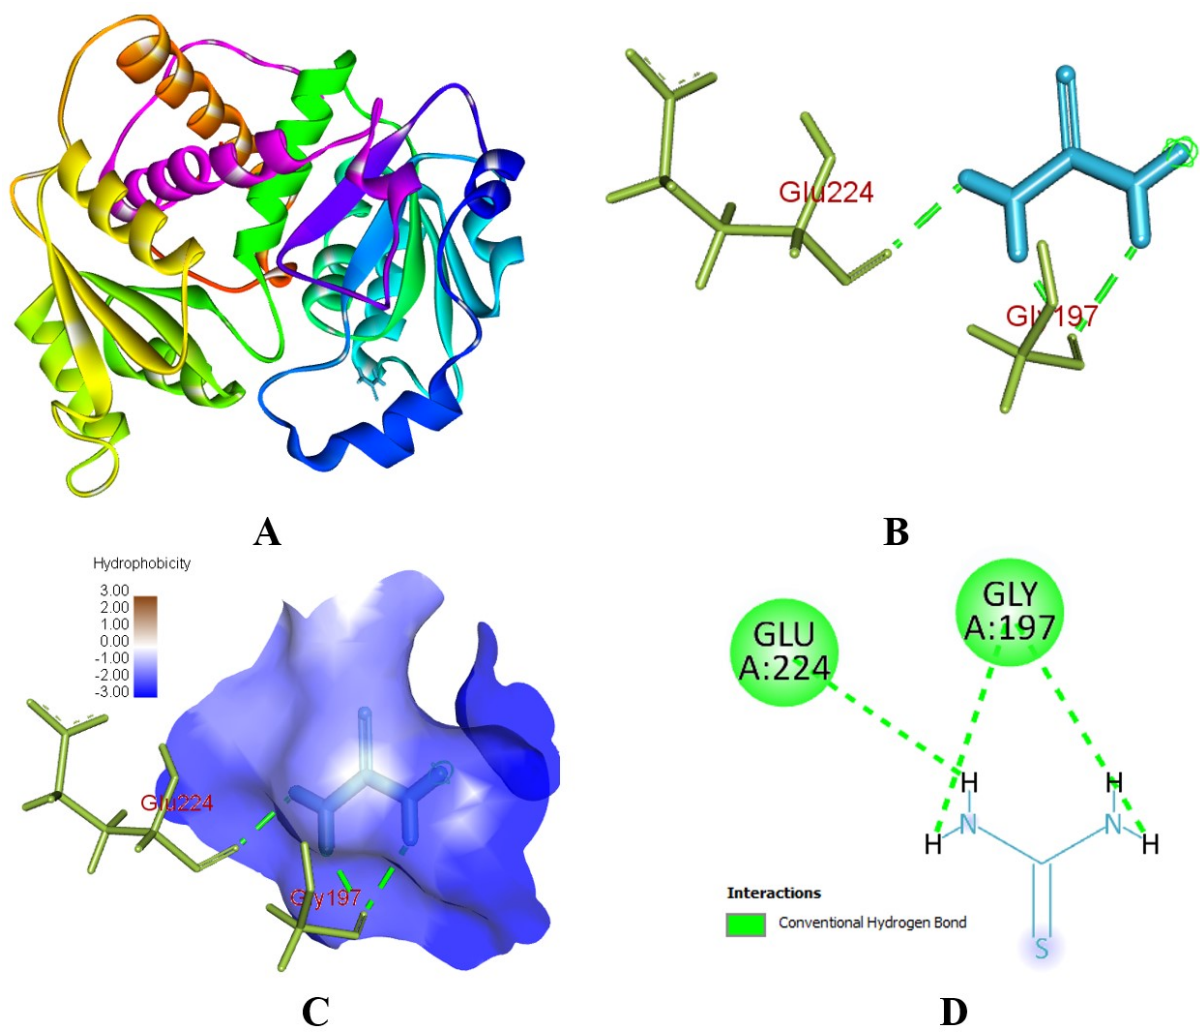

**Figure S1:** Interaction of 10TH protein with Thiourea (A) structure of protein (B) protein-ligand interaction (C) hydrophobic interaction (D) 2D diagram of ligand

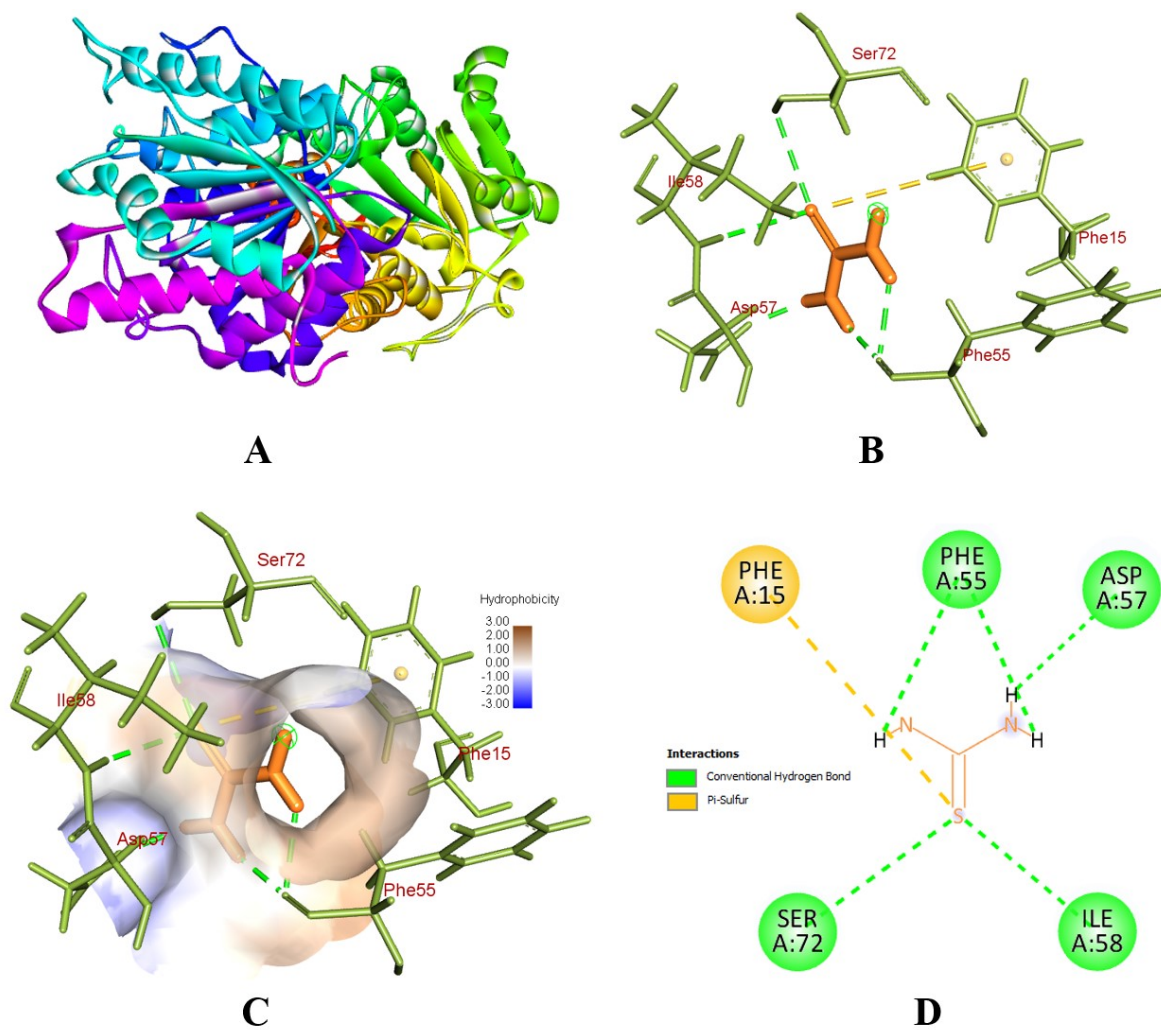

**Figure S2:** Interaction of 2ZVA protein with Thiourea (A) structure of protein (B) protein-ligand interaction (C) hydrophobic interaction (D) 2D diagram of ligand

**Table S4:** Represented molecular docking interactions of Acarbose (reference drug) and synthesized compounds (1-7) against  $\alpha$ -amylase proteins (ISMD and 5U3A)

| Compound | PDB ID  | Docking score | H-Bonds  | Protein-ligand interaction by H-bonding |              |          |                      | Protein-ligand interaction by hydrophobic interaction |              |             |                |
|----------|---------|---------------|----------|-----------------------------------------|--------------|----------|----------------------|-------------------------------------------------------|--------------|-------------|----------------|
|          |         |               |          | Amino acid residue                      | Distance (Å) | Category | Type                 | Amino acid residue                                    | Distance (Å) | Category    | Type           |
| 1        | ISMD    | -122.523      | 0        | HIS 201                                 | 2.57477      | H-Bond   | C-H Bond             | TYR 62                                                | 4.06583      | Hydrophobic | Pi-Pi Stacked  |
|          |         |               |          |                                         |              |          |                      | HIS 201                                               | 4.39658      | Hydrophobic | Pi-Pi T-shaped |
|          |         |               |          |                                         |              |          |                      | TRP 58                                                | 5.08119      | Hydrophobic | Pi-Alkyl       |
|          |         |               |          |                                         |              |          |                      | TRP 58                                                | 4.30347      | Hydrophobic | Pi-Alkyl       |
|          |         |               |          |                                         |              |          |                      | TRP 59                                                | 3.98805      | Hydrophobic | Pi-Alkyl       |
|          |         |               |          |                                         |              |          |                      | HIS 305                                               | 4.35167      | Hydrophobic | Pi-Alkyl       |
|          |         |               |          |                                         |              |          |                      | ALA 198                                               | 4.9098       | Hydrophobic | Pi-Alkyl       |
|          |         |               |          |                                         |              |          |                      | LYS 200                                               | 4.47151      | Hydrophobic | Pi-Alkyl       |
| ILE 235  | 4.58687 | Hydrophobic   | Pi-Alkyl |                                         |              |          |                      |                                                       |              |             |                |
| 2        |         | -116.956      | 0        | SER 163                                 | 2.80705      | H-Bond   | C-H Bond             | HIS 305                                               | 4.62483      | Hydrophobic | Pi-Pi T-shaped |
|          |         |               |          | HIS 305                                 | 2.37184      | H-Bond   | C-H Bond             | LEU 162                                               | 4.65841      | Hydrophobic | Alkyl          |
|          |         |               |          |                                         |              |          |                      | LEU 165                                               | 5.22929      | Hydrophobic | Pi-Alkyl       |
|          |         |               |          |                                         |              |          |                      | LEU 162                                               | 4.47         | Hydrophobic | Pi-Alkyl       |
| 3        |         | -116.33       | -        | GLN 63                                  | 2.25767      | H-Bond   | Conventional         | TYR 62                                                | 4.12342      | Hydrophobic | Pi-Pi Stacked  |
|          |         |               | 1.5543   | ASP 300                                 | 2.62308      | H-Bond   | H-Bond               | LEU 165                                               | 4.90831      | Hydrophobic | Pi-Alkyl       |
|          |         |               | 2        | ASP 300                                 | 2.64886      | H-Bond   | C-H Bond<br>C-H Bond |                                                       |              |             |                |
| 4        |         | -121.181      | 0        | HIS 201                                 | 2.46823      | H-Bond   | C-H Bond             | TYR 62                                                | 4.09448      | Hydrophobic | Pi-Pi T-shaped |
|          |         |               |          |                                         |              |          |                      | HIS 201                                               | 4.48029      | Hydrophobic | Pi-Pi T-shaped |
|          |         |               |          |                                         |              |          |                      | ALA 198                                               | 5.12293      | Hydrophobic | Pi-Alkyl       |
|          |         |               |          |                                         |              |          |                      | LYS 200                                               | 4.35369      | Hydrophobic | Pi-Alkyl       |
|          |         |               |          |                                         |              |          |                      | ILE 135                                               | 4.39439      | Hydrophobic | Pi-Alkyl       |
| 5        |         | -130.203      | 0        |                                         |              |          |                      | ILE 235                                               | 2.54528      | Hydrophobic | Pi-Sigma       |
|          |         |               |          |                                         |              |          |                      | TRP 59                                                | 4.74934      | Hydrophobic | Pi-Pi Stacked  |
|          |         |               |          |                                         |              |          |                      | TRP 59                                                | 4.80932      | Hydrophobic | Pi-Pi Stacked  |

|                 |          |         |         |        |              |         |         |             |                |
|-----------------|----------|---------|---------|--------|--------------|---------|---------|-------------|----------------|
|                 |          |         |         |        |              | TYR 62  | 3.98784 | Hydrophobic | Pi-Pi Stacked  |
|                 |          |         |         |        |              | HIS 201 | 4.81125 | Hydrophobic | Pi-Pi T-shaped |
|                 |          |         |         |        |              | HIS 201 | 4.40721 | Hydrophobic | Pi-Pi T-shaped |
|                 |          |         |         |        |              | LEU 162 | 5.03737 | Hydrophobic | Pi-Alkyl       |
|                 |          |         |         |        |              | ALA 198 | 4.42415 | Hydrophobic | Pi-Alkyl       |
|                 |          |         |         |        |              | ALA 198 | 5.40498 | Hydrophobic | Pi-Alkyl       |
|                 |          |         |         |        |              | LYS 200 | 4.31606 | Hydrophobic | Pi-Alkyl       |
| <b>6</b>        | 0        | HIS 201 | 2.75162 | H-Bond | C-H Bond     | TYR 62  | 4.15215 | Hydrophobic | Pi-Pi T-shaped |
|                 | -119.764 |         |         |        |              | HIS 201 | 4.43183 | Hydrophobic | Pi-Pi T-shaped |
|                 |          |         |         |        |              | ALA 198 | 4.84588 | Hydrophobic | Pi-Alkyl       |
|                 |          |         |         |        |              | LYS 200 | 4.34686 | Hydrophobic | Pi-Alkyl       |
|                 |          |         |         |        |              | ILE 135 | 4.58754 | Hydrophobic | Pi-Alkyl       |
| <b>7</b>        | 0        | HIS 201 | 2.46059 | H-Bond | C-H Bond     | TRP 59  | 4.84033 | Hydrophobic | Pi-Pi Stacked  |
|                 | -128.486 |         |         |        |              | TYR 62  | 4.11739 | Hydrophobic | Pi-Pi Stacked  |
|                 |          |         |         |        |              | HIS 201 | 4.49527 | Hydrophobic | Pi-Pi T-shaped |
|                 |          |         |         |        |              | ALA 198 | 4.96571 | Hydrophobic | Pi-Alkyl       |
|                 |          |         |         |        |              | LYS 200 | 4.35017 | Hydrophobic | Pi-Alkyl       |
|                 |          |         |         |        |              | ILE 135 | 4.4765  | Hydrophobic | Pi-Alkyl       |
| <b>Acarbose</b> | -        | ASP 197 | 1.8105  | H-Bond | Conventional | LEU 165 | 4.88528 | Hydrophobic | Alkyl          |
|                 | 14.100   | ASP 300 | 1.95489 | H-Bond | H-Bond       |         |         |             |                |
|                 | 9        | ASP 197 | 1.62316 | H-Bond | Conventional |         |         |             |                |
|                 |          | HIS 201 | 1.89935 | H-Bond | H-Bond       |         |         |             |                |
|                 |          | GLU 233 | 2.26313 | H-Bond | Conventional |         |         |             |                |
|                 |          | HIS 305 | 2.04716 | H-Bond | H-Bond       |         |         |             |                |
|                 | -111.221 | HIS 201 | 2.49215 | H-Bond | Conventional |         |         |             |                |
|                 |          | TRP 59  | 2.648   | H-Bond | H-Bond       |         |         |             |                |
|                 |          | ASP 300 | 2.67656 | H-Bond | Conventional |         |         |             |                |
|                 |          | GLU 233 | 2.82655 | H-Bond | H-Bond       |         |         |             |                |
|                 |          | HIS 201 | 2.29714 | H-Bond | Conventional |         |         |             |                |
|                 |          | ASP 197 | 2.90335 | H-Bond | H-Bond       |         |         |             |                |
|                 |          | ASP 356 | 3.05439 | H-Bond | C-H Bond     |         |         |             |                |
|                 |          | HIS 305 | 2.86783 | H-Bond | C-H Bond     |         |         |             |                |

|          |             |                   |                               |                               |                            |                                                                                              |                                                                                                                  |                                                                                                                       |                                                                                                                                                                   |                                                                                                                     |
|----------|-------------|-------------------|-------------------------------|-------------------------------|----------------------------|----------------------------------------------------------------------------------------------|------------------------------------------------------------------------------------------------------------------|-----------------------------------------------------------------------------------------------------------------------|-------------------------------------------------------------------------------------------------------------------------------------------------------------------|---------------------------------------------------------------------------------------------------------------------|
|          |             |                   | TRP 59                        | 2.60264                       | H-Bond                     | C-H Bond<br>C-H Bond<br>C-H Bond<br>C-H Bond<br>C-H Bond<br>C-H Bond<br>Pi-Donor C-H<br>Bond |                                                                                                                  |                                                                                                                       |                                                                                                                                                                   |                                                                                                                     |
| <b>1</b> | <b>5U3A</b> | -<br>0.8563<br>75 | GLN 63<br>THR 163             | 2.59631<br>2.63444            | H-Bond<br>H-Bond           | Conventional<br>H-Bond<br>Pi-Donor C-H<br>Bond                                               | TRP 58<br>TYR 62<br>LEU 162<br>LEU 165<br>TRP 59<br>TYR 62<br>TYR 62<br>HIS 101<br>HIS 299<br>LEU 165<br>LEU 162 | 2.82436<br>4.13933<br>5.21172<br>4.41345<br>4.73249<br>5.18159<br>4.04032<br>3.97068<br>4.61241<br>5.21083<br>5.49875 | Hydrophobic<br>Hydrophobic<br>Hydrophobic<br>Hydrophobic<br>Hydrophobic<br>Hydrophobic<br>Hydrophobic<br>Hydrophobic<br>Hydrophobic<br>Hydrophobic<br>Hydrophobic | Pi-Sigma<br>Pi-Pi Stacked<br>Alkyl<br>Alkyl<br>Pi-Alkyl<br>Pi-Alkyl<br>Pi-Alkyl<br>Pi-Alkyl<br>Pi-Alkyl<br>Pi-Alkyl |
|          |             | -129.595          |                               |                               |                            |                                                                                              |                                                                                                                  |                                                                                                                       |                                                                                                                                                                   |                                                                                                                     |
| <b>2</b> |             | 0                 | HIS 101<br>ASP 300<br>ASP 300 | 2.974<br>3.61554<br>4.02402   | H-Bond<br>H-Bond<br>H-Bond | C-H Bond<br>Pi-Donor C-H<br>Bond<br>Pi-Donor C-H<br>Bond                                     | ILE 235<br>TYR 62<br>HIS 201<br>ALA 307<br>ILE 235<br>PHE 256<br>LYS 200<br>ILE 235                              | 2.46327<br>4.03258<br>4.35594<br>4.15963<br>4.97331<br>4.31257<br>4.90096<br>4.57476                                  | Hydrophobic<br>Hydrophobic<br>Hydrophobic<br>Hydrophobic<br>Hydrophobic<br>Hydrophobic<br>Hydrophobic<br>Hydrophobic                                              | Pi-Sigma<br>Pi-Pi Stacked<br>Pi-Pi T-shaped<br>Alkyl<br>Alkyl<br>Pi-Alkyl<br>Pi-Alkyl<br>Pi-Alkyl                   |
|          |             | -136.814          |                               |                               |                            |                                                                                              |                                                                                                                  |                                                                                                                       |                                                                                                                                                                   |                                                                                                                     |
| <b>3</b> |             | -<br>2.1743<br>4  | GLN 63<br>ASP 300<br>ASP 300  | 2.18734<br>2.63534<br>2.90367 | H-Bond<br>H-Bond<br>H-Bond | Conventional<br>H-Bond<br>C-H Bond<br>C-H Bond                                               | TYR 62<br>TRP 59<br>ILE 165                                                                                      | 4.16282<br>5.26822<br>4.58755                                                                                         | Hydrophobic<br>Hydrophobic<br>Hydrophobic                                                                                                                         | Pi-Pi Stacked<br>Pi-Pi T-shaped<br>Pi-Alkyl                                                                         |
|          |             | -132.725          |                               |                               |                            |                                                                                              |                                                                                                                  |                                                                                                                       |                                                                                                                                                                   |                                                                                                                     |

|   |         |          |         |              |         |                  |          |         |             |                |                |          |
|---|---------|----------|---------|--------------|---------|------------------|----------|---------|-------------|----------------|----------------|----------|
| 4 | -5      | -132.011 | LYS 200 | 3.00684      | H-Bond  | Conventional     | HIS 201  | 4.2464  | Hydrophobic | Pi-Pi T-shaped |                |          |
|   |         |          | LYS 200 | 2.36806      | H-Bond  | H-Bond           | ALA 307  | 3.80255 | Hydrophobic | Alkyl          |                |          |
|   |         |          | LYS 200 | 2.12809      | H-Bond  | Conventional     | ILE 235  | 4.76093 | Hydrophobic | Alkyl          |                |          |
|   |         |          |         |              |         | H-Bond           | PHE 256  | 4.29699 | Hydrophobic | Pi-Alkyl       |                |          |
|   |         |          |         |              |         | Conventional     | ILE 235  | 4.39493 | Hydrophobic | Pi-Alkyl       |                |          |
|   |         |          |         |              |         | H-Bond           | ALA 307  | 4.31011 | Hydrophobic | Pi-Alkyl       |                |          |
|   |         |          |         |              |         |                  | LEU 162  | 5.32705 | Hydrophobic | Pi-Alkyl       |                |          |
|   |         |          |         |              |         |                  | ALA 198  | 4.95834 | Hydrophobic | Pi-Alkyl       |                |          |
|   |         |          |         |              |         |                  | LYS 200  | 5.39353 | Hydrophobic | Pi-Alkyl       |                |          |
|   |         |          |         |              |         |                  | ILE 235  | 4.78965 | Hydrophobic | Pi-Alkyl       |                |          |
|   |         |          |         |              |         |                  | I;E 235  | 4.60736 | Hydrophobic | Pi-Alkyl       |                |          |
|   |         |          |         | ALA 307      | 5.40135 | Hydrophobic      | Pi-Alkyl |         |             |                |                |          |
| 5 | -153.67 | -7.4467  | ASP 300 | 3.60252      | H-Bond  | Pi-Donor<br>Bond | C-H      | TRP 58  | 4.98877     | Hydrophobic    | Pi-Pi Stacked  |          |
|   |         |          |         |              |         |                  |          | HIS 201 | 4.36037     | Hydrophobic    | Pi-Pi T-shaped |          |
|   |         |          |         |              |         |                  |          |         | ARG 303     | 4.73246        | Hydrophobic    | Pi-Alkyl |
|   |         |          |         |              |         |                  |          |         | LEU 162     | 4.80283        | Hydrophobic    | Pi-Alkyl |
|   |         |          |         |              |         |                  |          |         | ALA 198     | 4.8166         | Hydrophobic    | Pi-Alkyl |
|   |         |          |         |              |         |                  |          |         | ALA 198     | 4.69767        | Hydrophobic    | Pi-Alkyl |
|   |         |          |         |              |         |                  |          |         | LYS 200     | 4.98611        | Hydrophobic    | Pi-Alkyl |
| 6 | -119.52 | -4.4269  | THR 163 | 2.8          | H-Bond  | Conventional     | TRP 58   | 2.83849 | Hydrophobic | Pi-Sigma       |                |          |
|   |         |          | THR 163 | 2.97866      | H-Bond  | H-Bond           | TRP 59   | 5.85015 | Hydrophobic | Pi-Pi Stacked  |                |          |
|   |         |          |         |              |         | C-H Bond         | TRP 59   | 5.72454 | Hydrophobic | Pi-Pi Stacked  |                |          |
|   |         |          |         |              |         |                  | ARG 303  | 4.80812 | Hydrophobic | Pi-Alkyl       |                |          |
|   |         |          |         |              |         |                  | LEU 165  | 5.06341 | Hydrophobic | Pi-Alkyl       |                |          |
| 7 | -137.62 | 0        | GLN 63  | 2.87023      | H-Bond  | Conventional     | TRP 58   | 3.02622 | Hydrophobic | Pi-Sigma       |                |          |
|   |         |          | THR 163 | 2.2062       | H-Bond  | H-Bond           | ARAG 303 | 4.66403 | Hydrophobic | Pi-Alkyl       |                |          |
|   |         |          | THR 163 | 2.45618      | H-Bond  | Conventional     |          |         |             |                |                |          |
|   |         |          | THR 163 | 2.27296      | H-Bond  | H-Bond           |          |         |             |                |                |          |
|   |         |          | THR 163 | 2.93759      | H-Bond  | Conventional     |          |         |             |                |                |          |
|   |         |          | THR 163 | 2.35082      | H-Bond  | H-Bond           |          |         |             |                |                |          |
|   |         |          |         | Conventional |         |                  |          |         |             |                |                |          |

|                 |          |         |         | H-Bond       | C-H Bond     |         |         |             |          |
|-----------------|----------|---------|---------|--------------|--------------|---------|---------|-------------|----------|
|                 |          |         |         | H-Bond       | C-H Bond     |         |         |             |          |
| <b>Acarbose</b> | -21.557  | LYS 200 | 2.8504  | H-Bond       | Conventional | LEU 165 | 3.2855  | Hydrophobic | Alkyl    |
|                 |          | LYS 200 | 2.42598 | H-Bond       | H-Bond       | HIS 101 | 3.97636 | Hydrophobic | Pi-Alkyl |
|                 |          | TRP 59  | 1.32563 | H-Bond       | Conventional |         |         |             |          |
|                 |          | ASP 197 | 1.80631 | H-Bond       | H-Bond       |         |         |             |          |
|                 |          | ASP 300 | 1.83077 | H-Bond       | Conventional |         |         |             |          |
|                 |          | THR 163 | 2.226   | H-Bond       | H-Bond       |         |         |             |          |
|                 |          | THR 163 | 2.20609 | H-Bond       | Conventional |         |         |             |          |
|                 |          | ASP 197 | 1.66424 | H-Bond       | H-Bond       |         |         |             |          |
|                 |          | THR 163 | 1.75378 | H-Bond       | Conventional |         |         |             |          |
|                 |          | THR 163 | 1.80251 | H-Bond       | H-Bond       |         |         |             |          |
|                 |          | TRP 59  | 2.91442 | H-Bond       | Conventional |         |         |             |          |
|                 |          | ASP 197 | 2.94579 | H-Bond       | H-Bond       |         |         |             |          |
|                 |          | ASP 300 | 2.71705 | H-Bond       | Conventional |         |         |             |          |
|                 | -118.885 | GLU 233 | 2.93181 | H-Bond       | H-Bond       |         |         |             |          |
|                 |          | ASP 300 | 2.90226 | H-Bond       | Conventional |         |         |             |          |
|                 |          | ASP 197 | 3.0589  | H-Bond       | H-Bond       |         |         |             |          |
|                 |          | HIS 201 | 2.24202 | H-Bond       | Conventional |         |         |             |          |
|                 |          |         |         | H-Bond       | H-Bond       |         |         |             |          |
|                 |          |         |         | Conventional | Conventional |         |         |             |          |
|                 |          |         |         | H-Bond       | H-Bond       |         |         |             |          |
|                 |          |         |         | C-H Bond     | C-H Bond     |         |         |             |          |
|                 |          |         |         | C-H Bond     | C-H Bond     |         |         |             |          |
|                 |          |         |         | C-H Bond     | C-H Bond     |         |         |             |          |
|                 |          |         |         | C-H Bond     | C-H Bond     |         |         |             |          |
|                 |          |         |         | C-H Bond     | C-H Bond     |         |         |             |          |
|                 |          |         |         | C-H Bond     | C-H Bond     |         |         |             |          |
|                 |          |         |         | C-H Bond     | C-H Bond     |         |         |             |          |

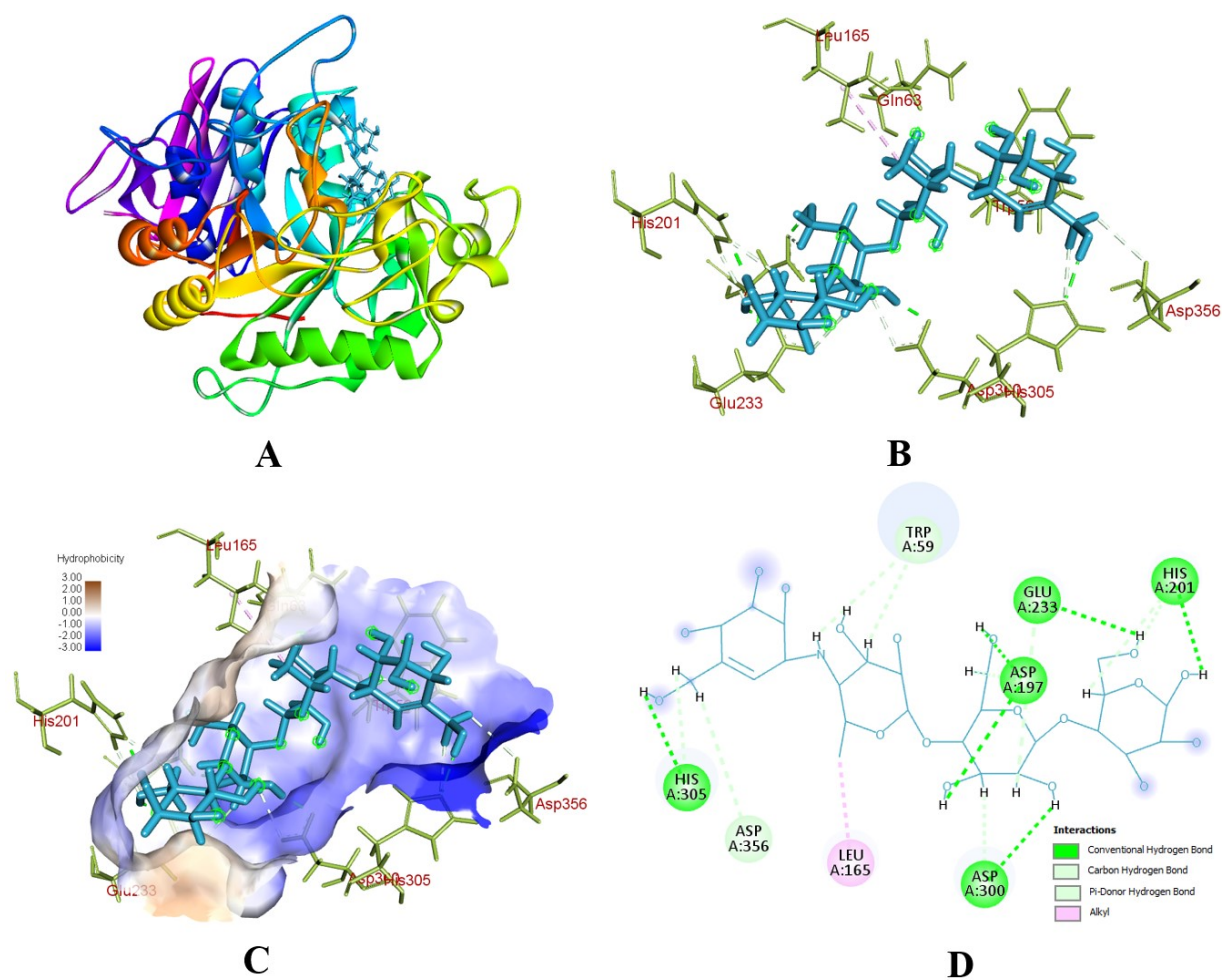

**Figure S3:** Interaction of 1SMD protein with Acarbose (A) structure of protein (B) protein-ligand interaction (C) hydrophobic interaction (D) 2D diagram of ligand

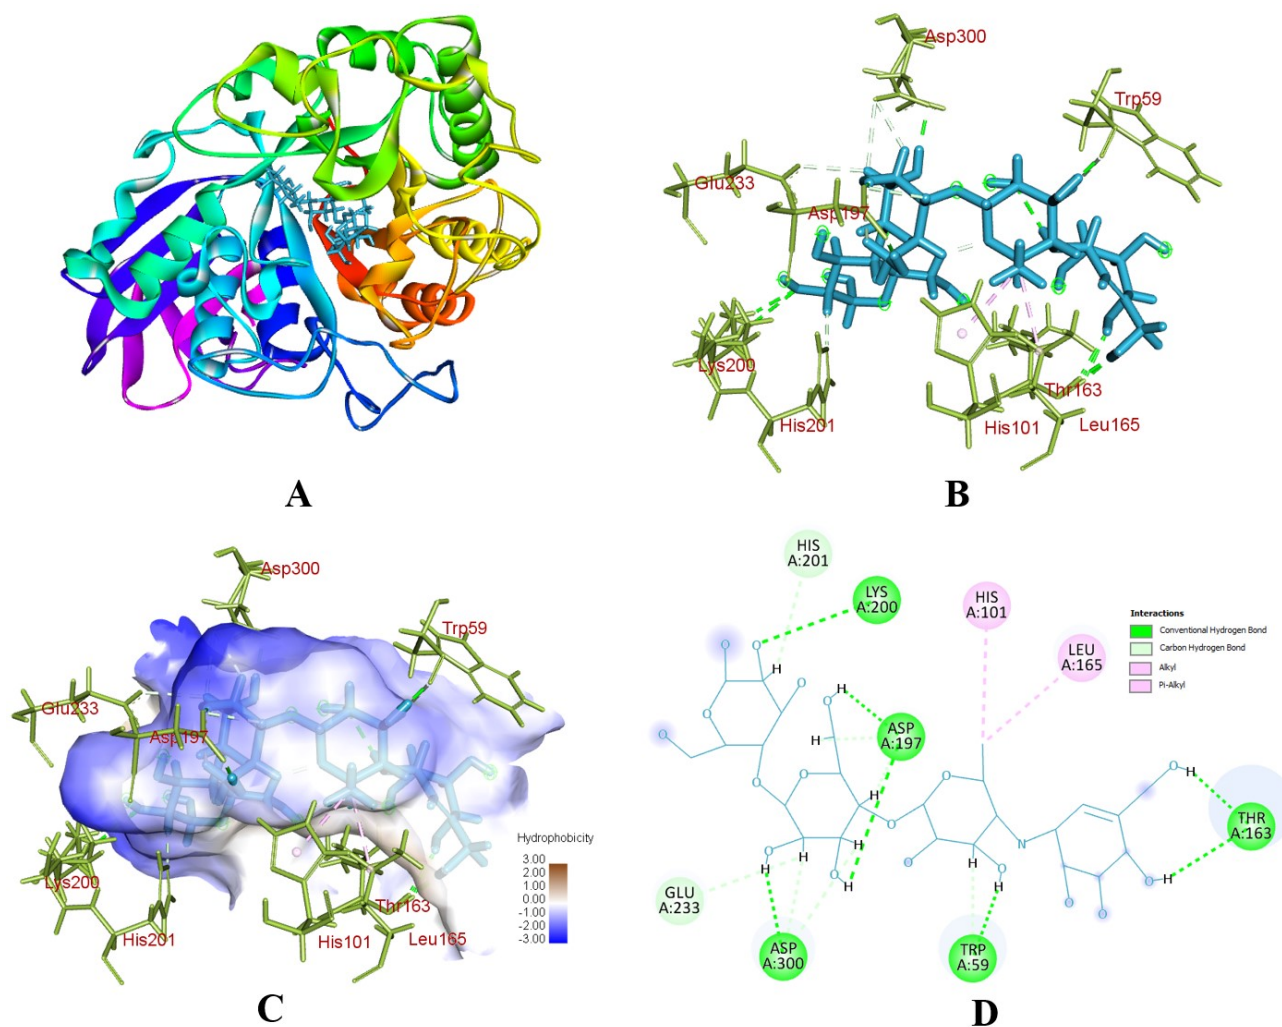

**Figure S4:** Interaction of 5U3A protein with Acarbose (A) structure of protein (B) protein-ligand interaction (C) hydrophobic interaction (D) 2D diagram of ligand

### 2.3. DFT Study

**Table S5:** HOMO, LUMO, energy gap and the global quantum reactivity's calculated at DFT/B3LYP/6-311G level

|                                                   | Formula                  | Acarbose         | Thiourea        | Compound<br>5    | Compound<br>7    |
|---------------------------------------------------|--------------------------|------------------|-----------------|------------------|------------------|
| Dipole moment (Debye)                             |                          | 9.201717         | 6.197388        | 6.712490         | 5.573720         |
| Electronic energy (Hartree)                       |                          | -<br>2387.101829 | -<br>548.228339 | -<br>1662.361236 | -<br>1713.182469 |
| LUMO (Hartree)                                    |                          | -0.01456         | -0.00672        | -0.13624         | -0.14741         |
| HOMO (Hartree)                                    |                          | -0.21573         | -0.21029        | -0.24412         | -0.24634         |
| Energy gap (Hartree)                              | $E_{HOMO} - E_{LUMO}$    | 0.20117          | 0.20357         | 0.10788          | 0.09893          |
| Electron Affinity (A, Hartree)                    | $A = -E_{LUMO}$          | 0.01456          | 0.00672         | 0.13624          | 0.14741          |
| Ionization Potential (I, Hartree)                 | $I = -E_{HOMO}$          | 0.21573          | 0.21029         | 0.24412          | 0.24634          |
| Chemical potential (μ, Hartree)                   | $\mu = 1/2 (I + A)$      | 0.11515          | 0.10851         | 0.19018          | 0.19688          |
| Electronegativity (χ, Hartree)                    | $\chi = -1/2 (I + A)$    | -0.11515         | -0.10851        | -0.19018         | -0.19688         |
| Chemical hardness (η, Hartree)                    | $\eta = 1/2 (I - A)$     | 0.10059          | 0.10179         | 0.05394          | 0.04947          |
| Chemical softness (S, Hartree <sup>-1</sup> )     | $S = 1/\eta$             | 9.94             | 9.83            | 18.54            | 20.22            |
| Electrophilicity index (ω, Hartree)               | $\omega = 2(\mu^2/\eta)$ | 0.0659           | 0.0578          | 0.3353           | 0.3918           |
| Nucleophilicity index (N, Hartree <sup>-1</sup> ) | $N = 1/\omega$           | 15.17            | 17.29           | 2.98             | 2.55             |
| Additional electronic charge                      | $= -\mu/\eta$            | -1.145           | -1.066          | -3.53            | -3.98            |

## FTIR Spectra of the Newly Synthesized Compounds

### FTIR Spectrum of Compound 1

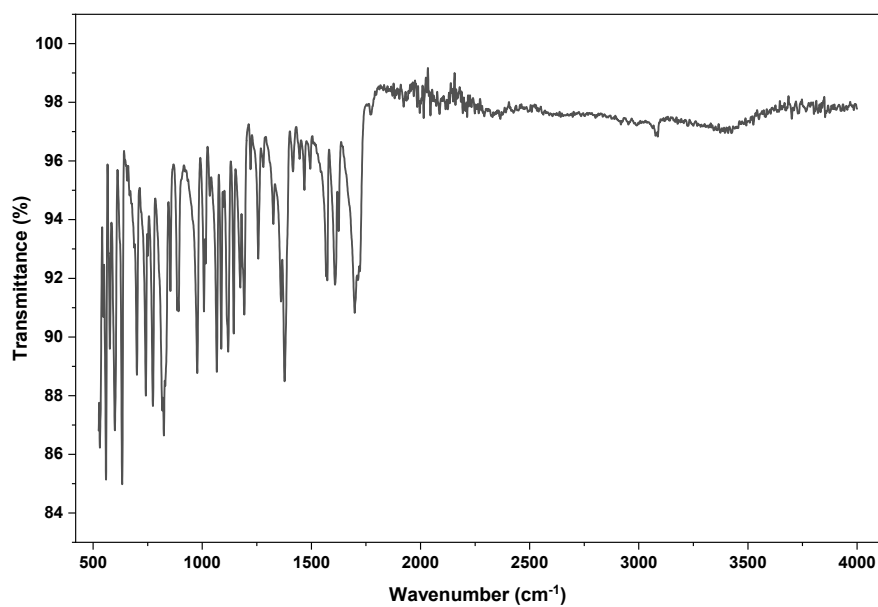

### FTIR Spectrum of Compound 2

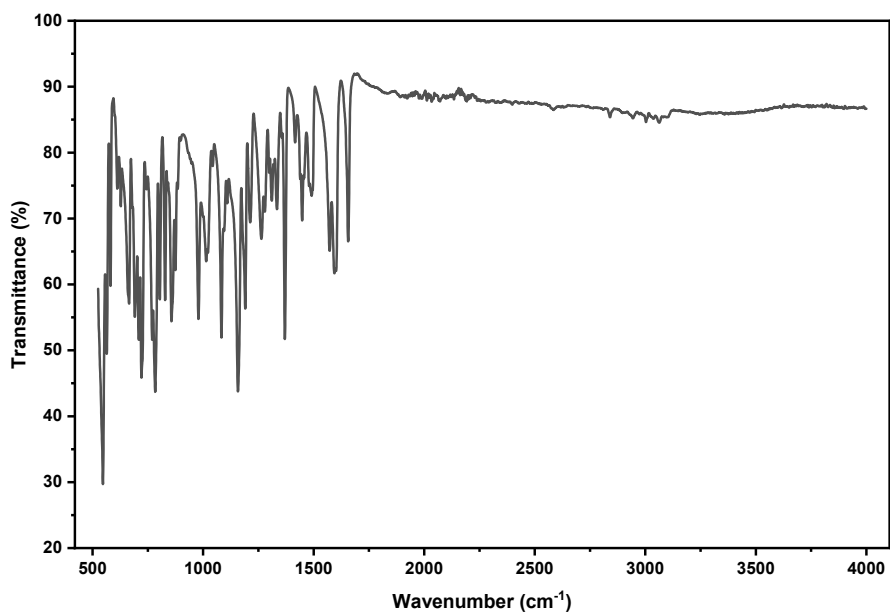

**FTIR Spectrum of Compound 3**

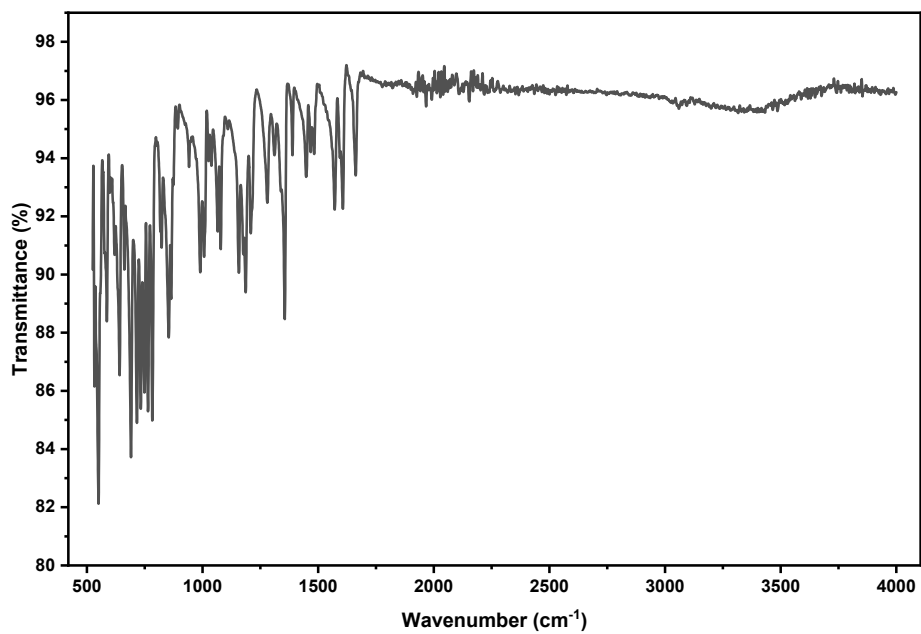

**FTIR Spectrum of Compound 4**

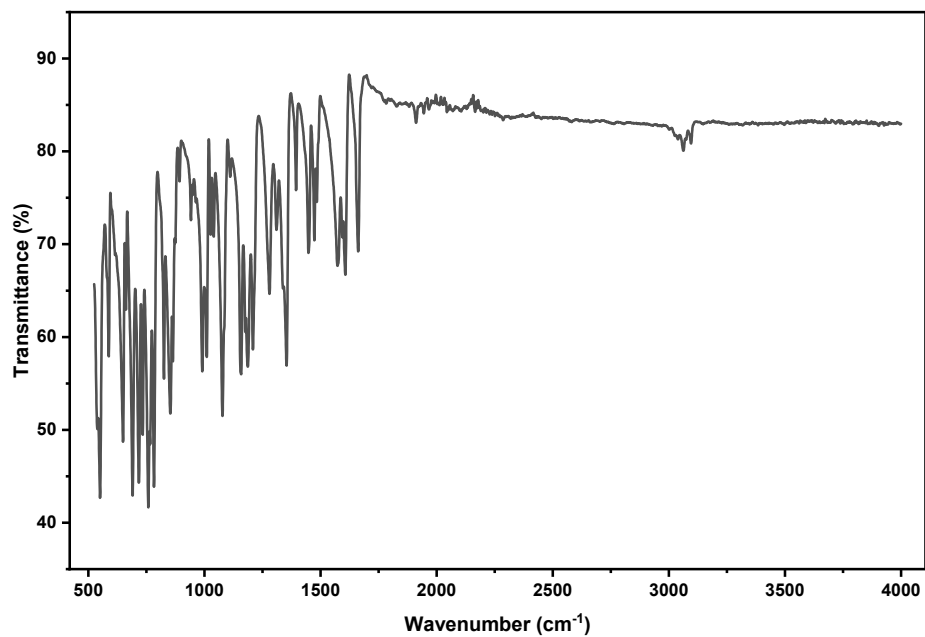

**FTIR Spectrum of Compound 5**

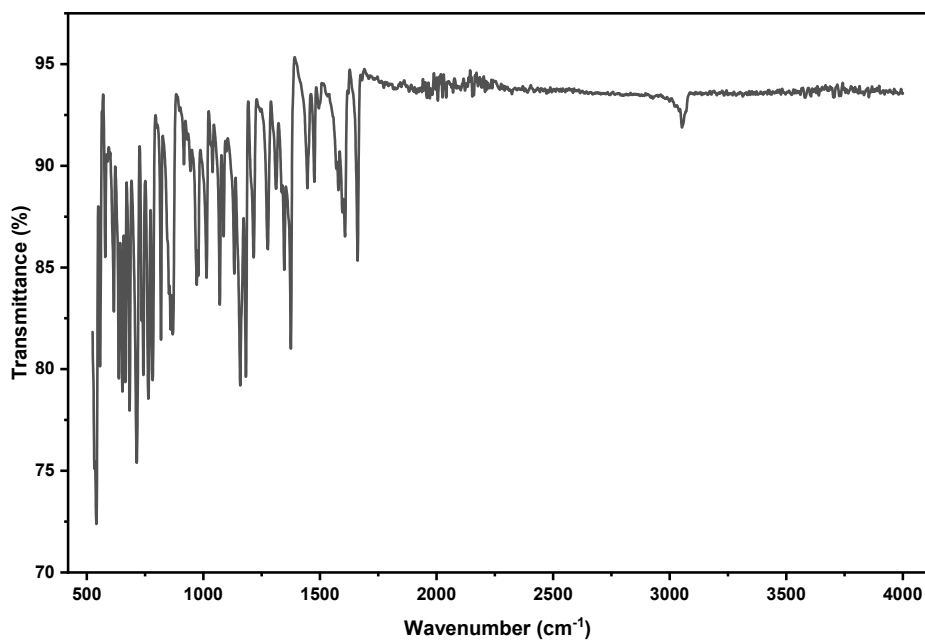

**FTIR Spectrum of Compound 6**

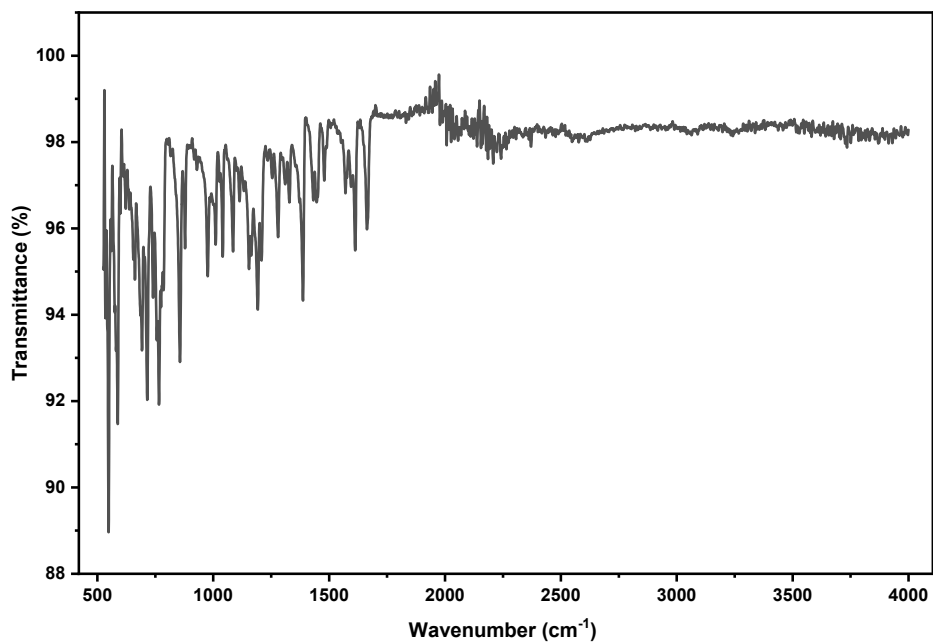

### FTIR Spectrum of Compound 7

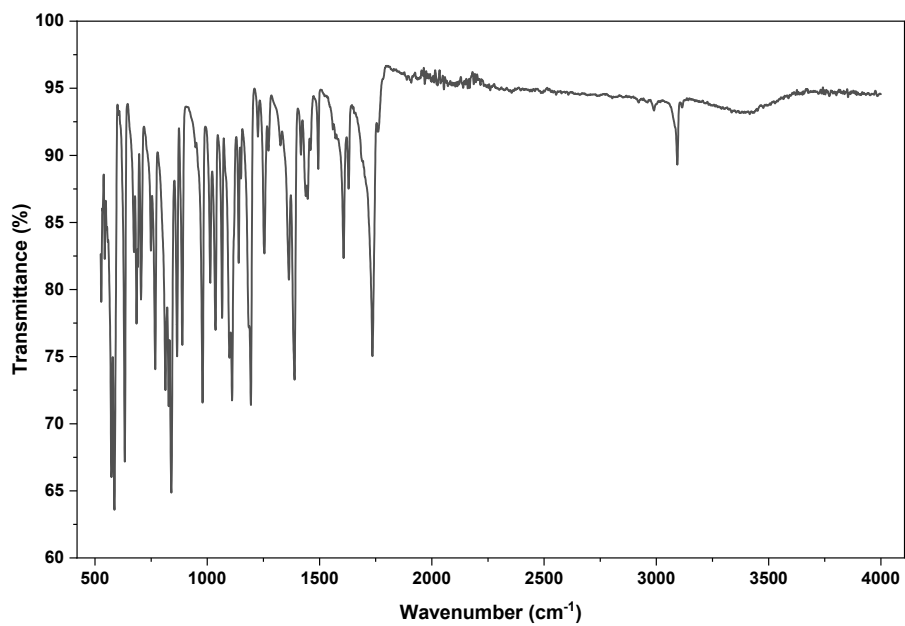

**Mass Spectra of the Newly Synthesized Compounds**

**Mass Spectrum of Compound 1**

FRUK | AHMED IAC-CH-01 #17-423 RT: 0.04-0.98 AV: 407 NL: 3.44E8  
T: FTMS + p ESI Full ms [133.4000-1000.0000]

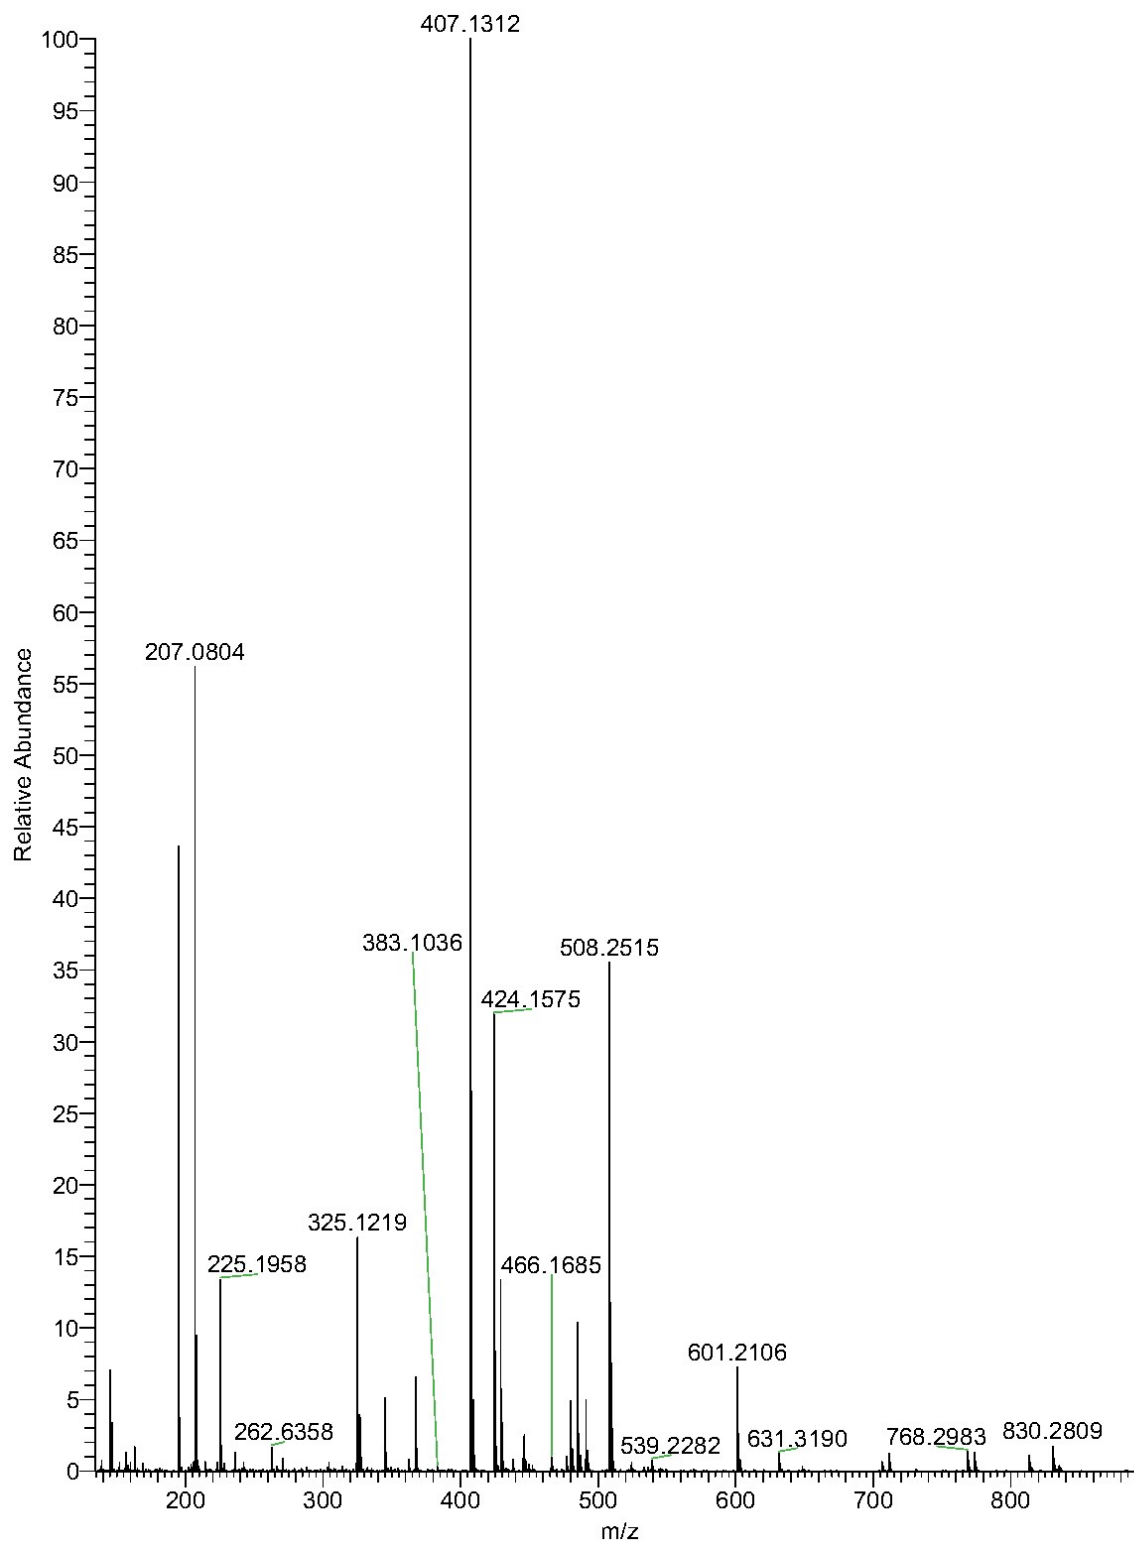

**Mass Spectrum of Compound 2**

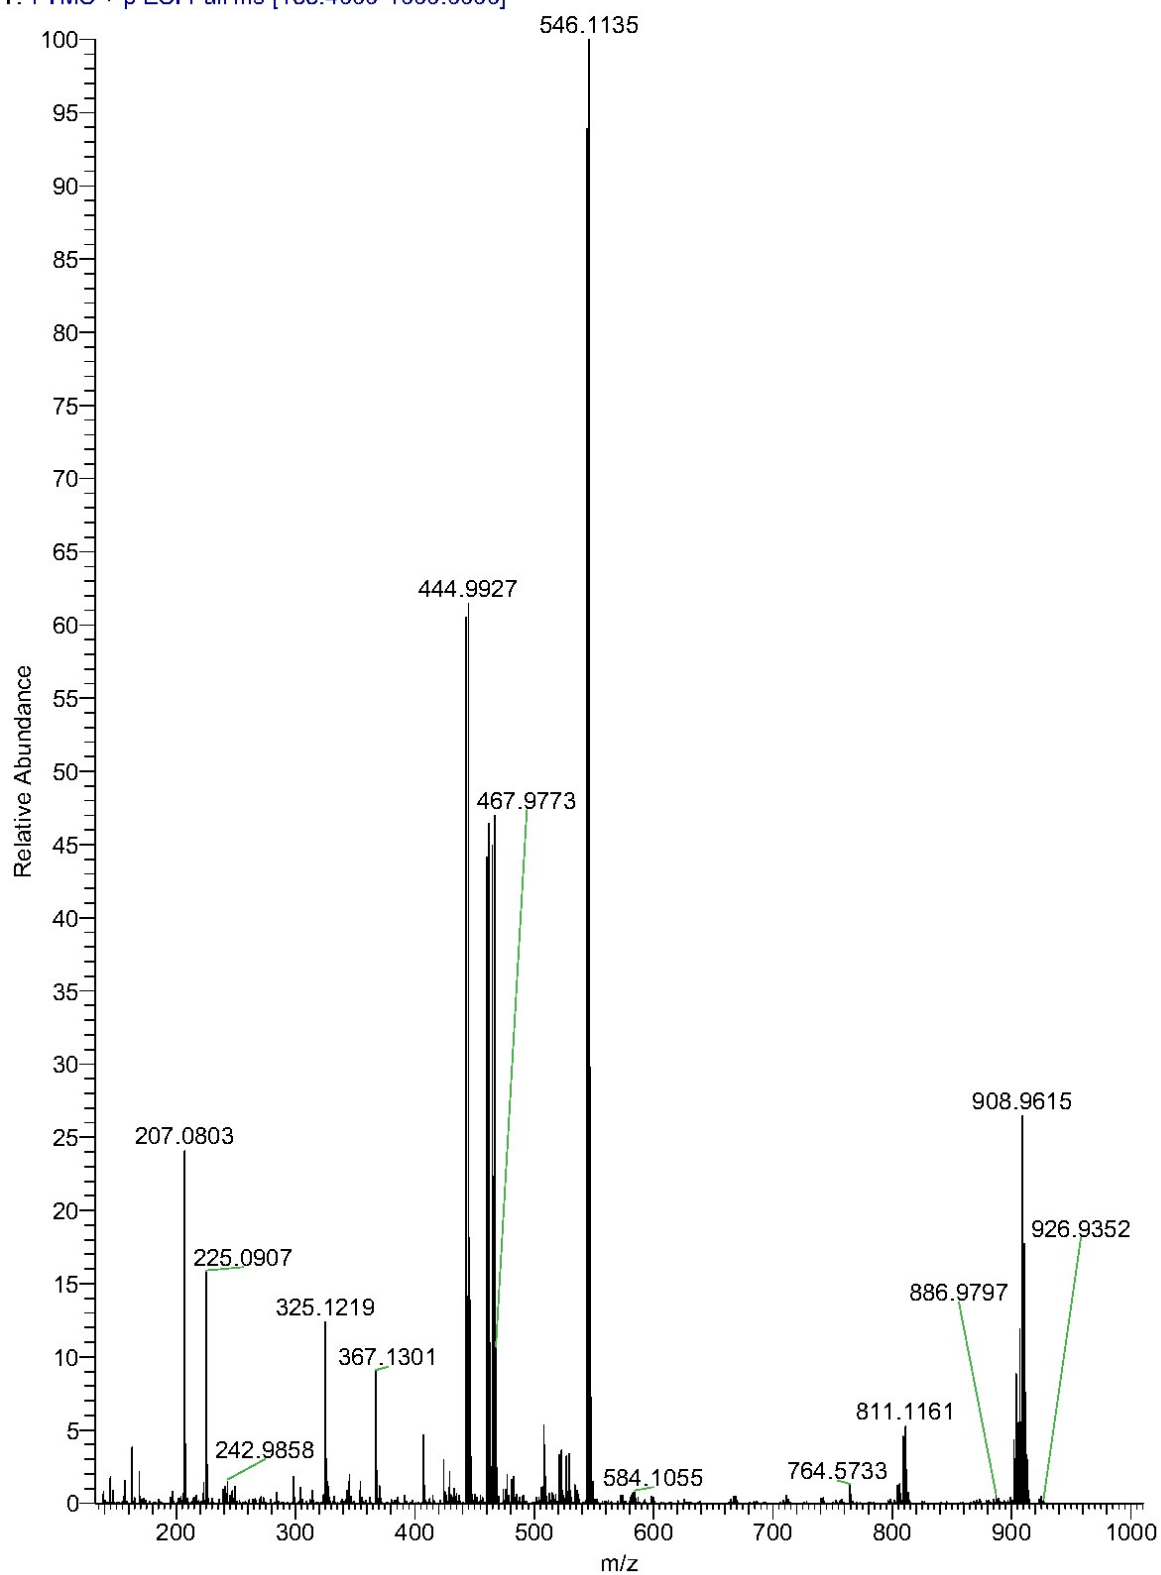

Mass Spectrum of Compound 3

Spectrum from 240226 Charlene.wf2 (example 2) - Handrawn CSS POS - TOF MS (100 - 500) from 1.550 to 2.080 min

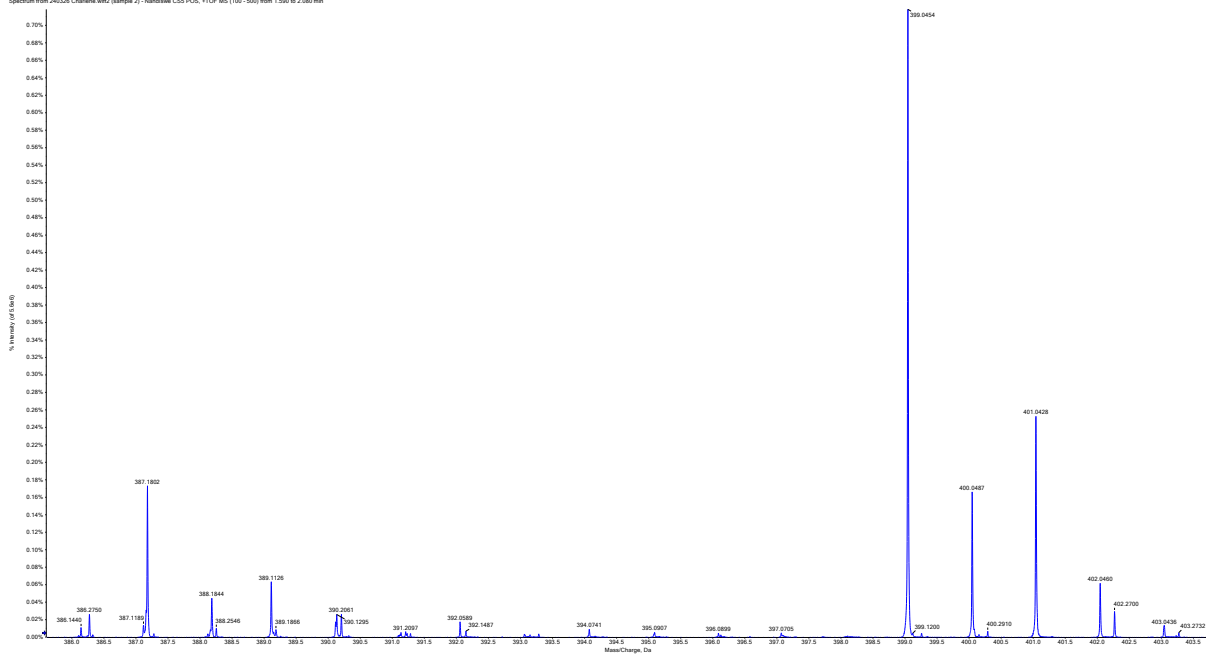

Spectrum from 240226 Charlene.wf2 (example 4) - Handrawn CSS NEG, TOF MS (100 - 500) from 1.550 to 2.080 min

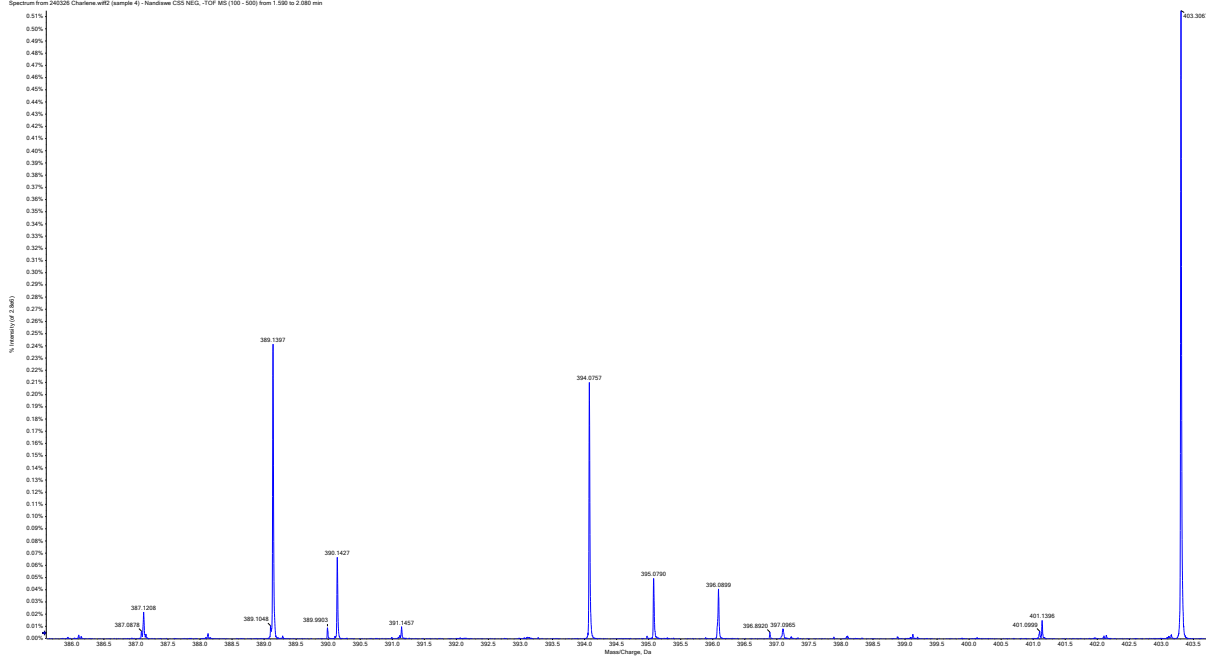

## Mass Spectrum of Compound 4

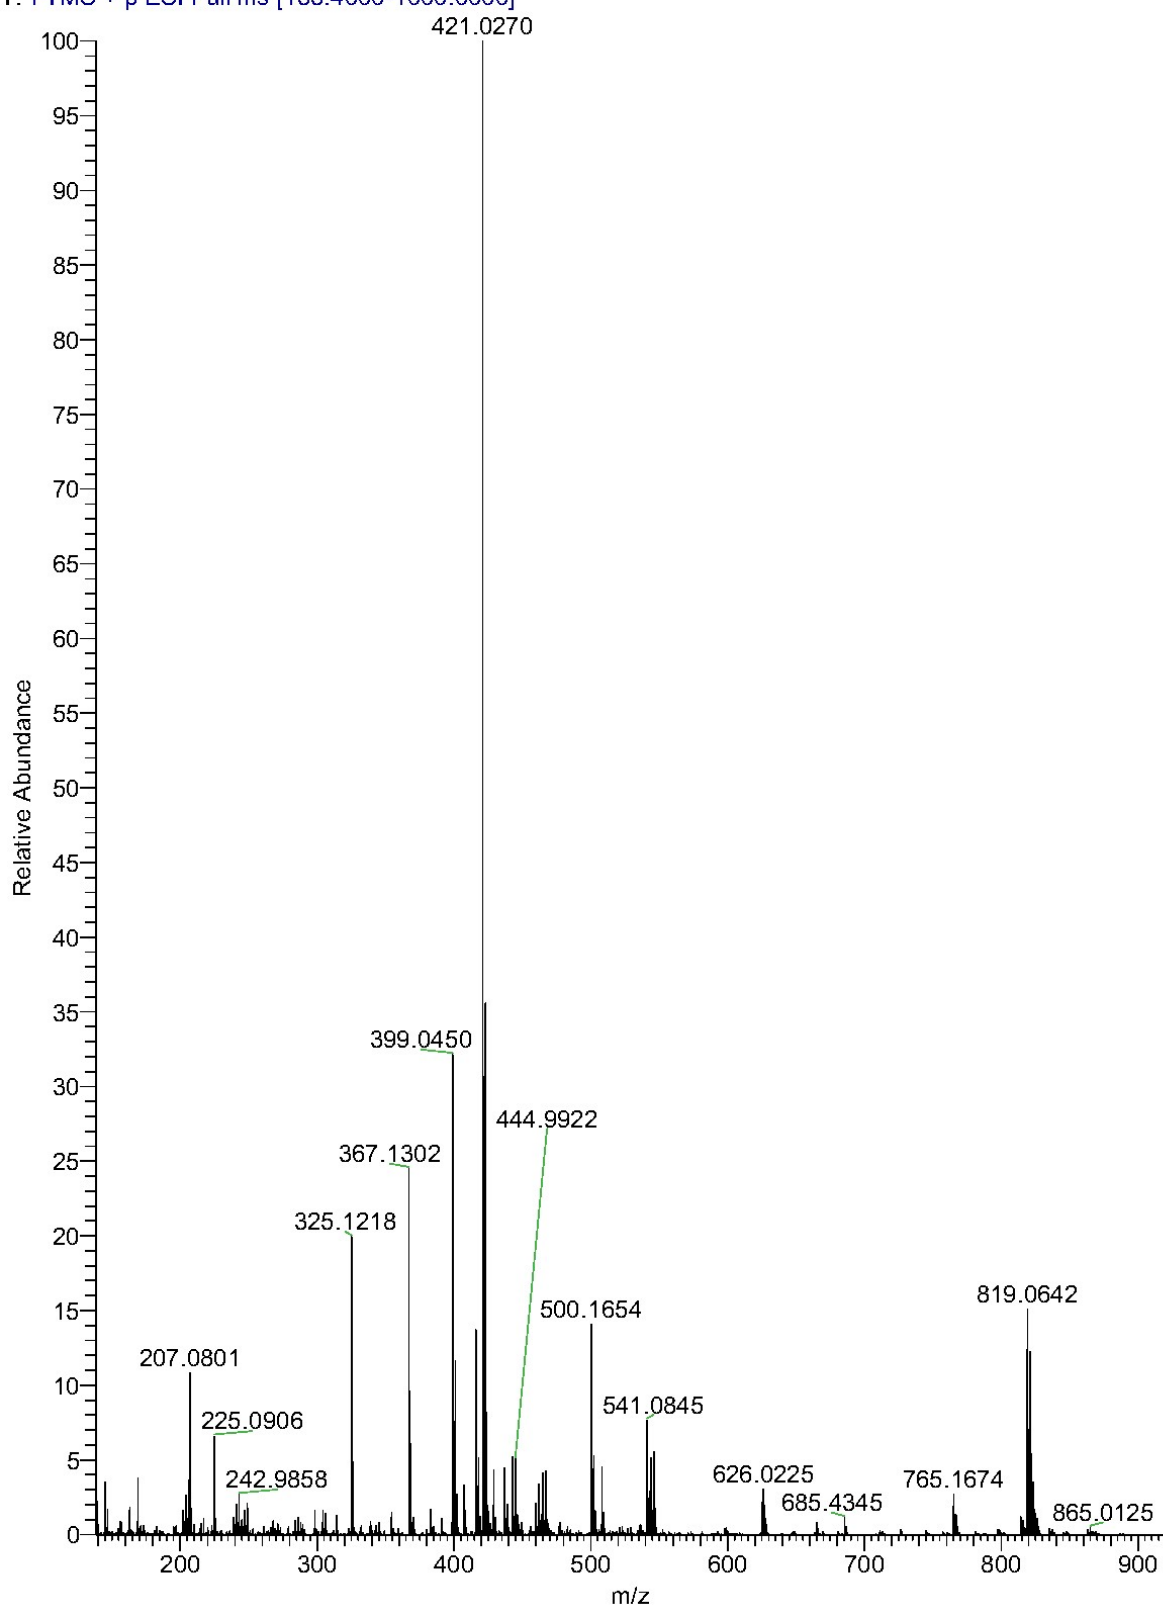

Mass Spectrum of Compound 5

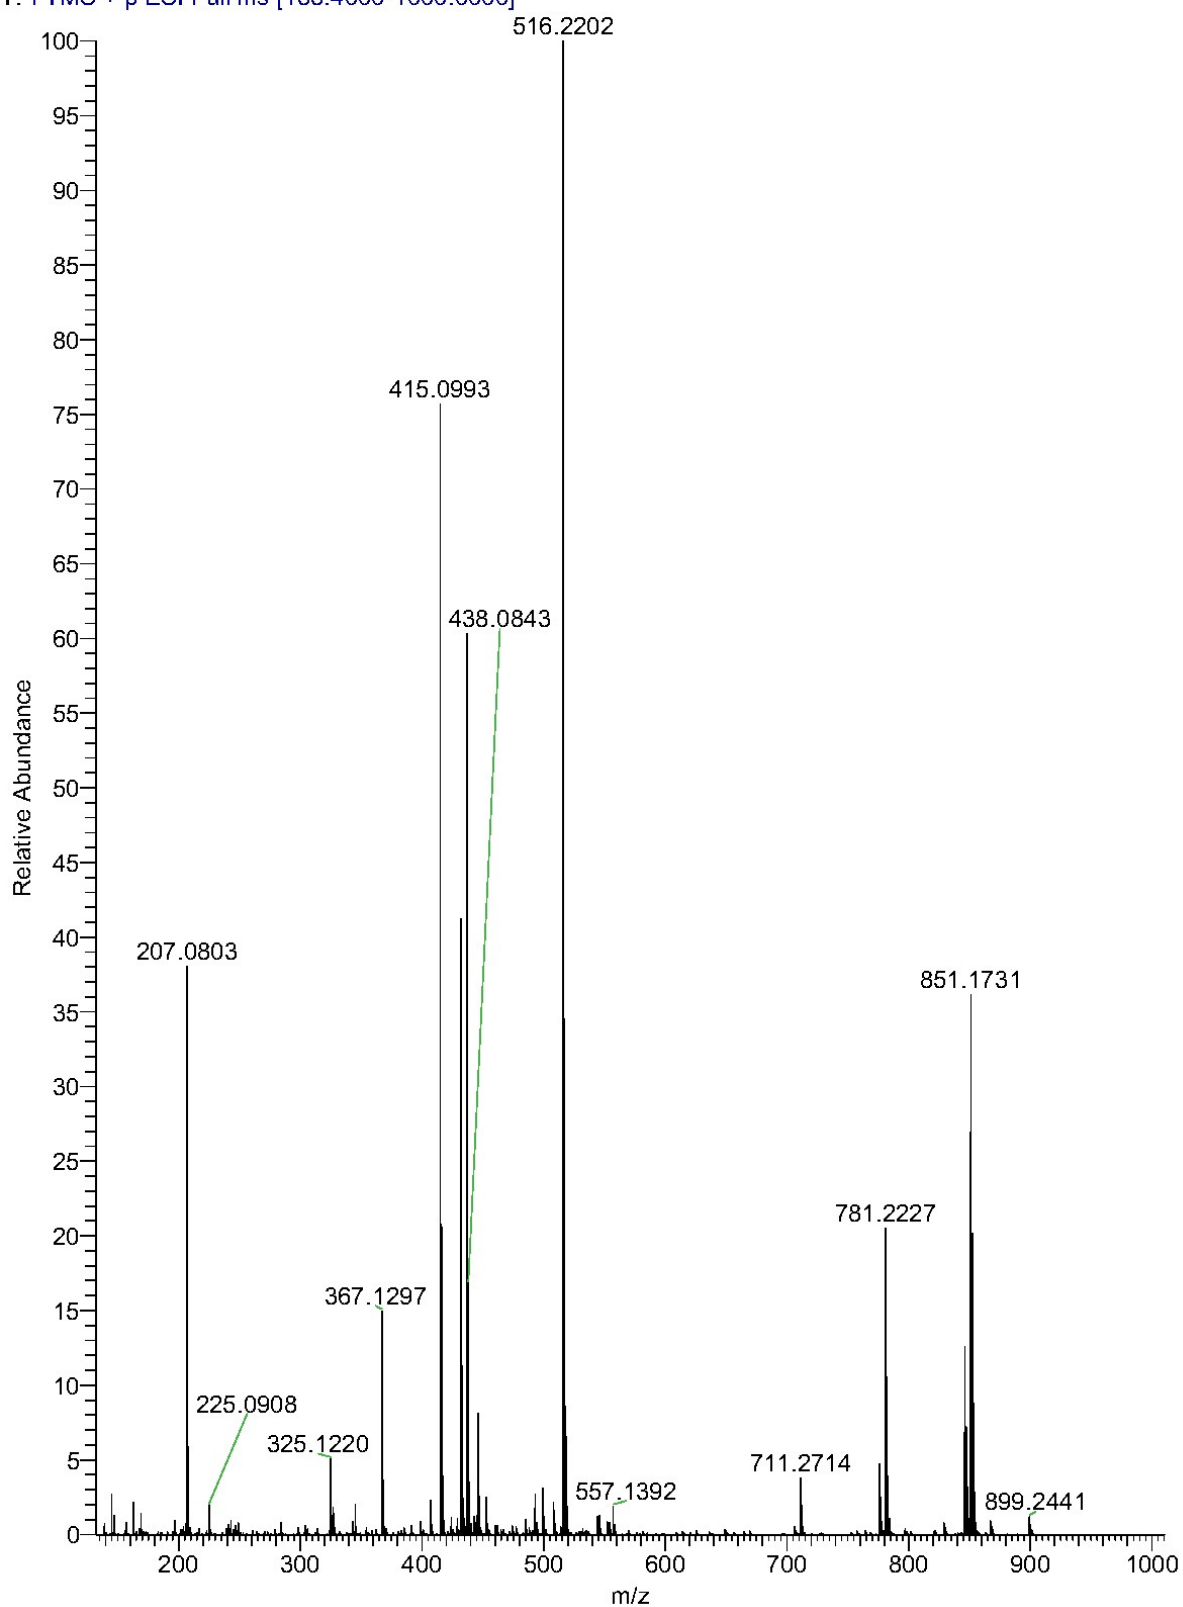

Mass Spectrum of Compound 6

FRUK I AHMED IAC-CH-08 #16-353 RT: 0.04-0.82 AV: 338 NL: 6.93E8  
T: FTMS + p ESI Full ms [100.0000-1000.0000]

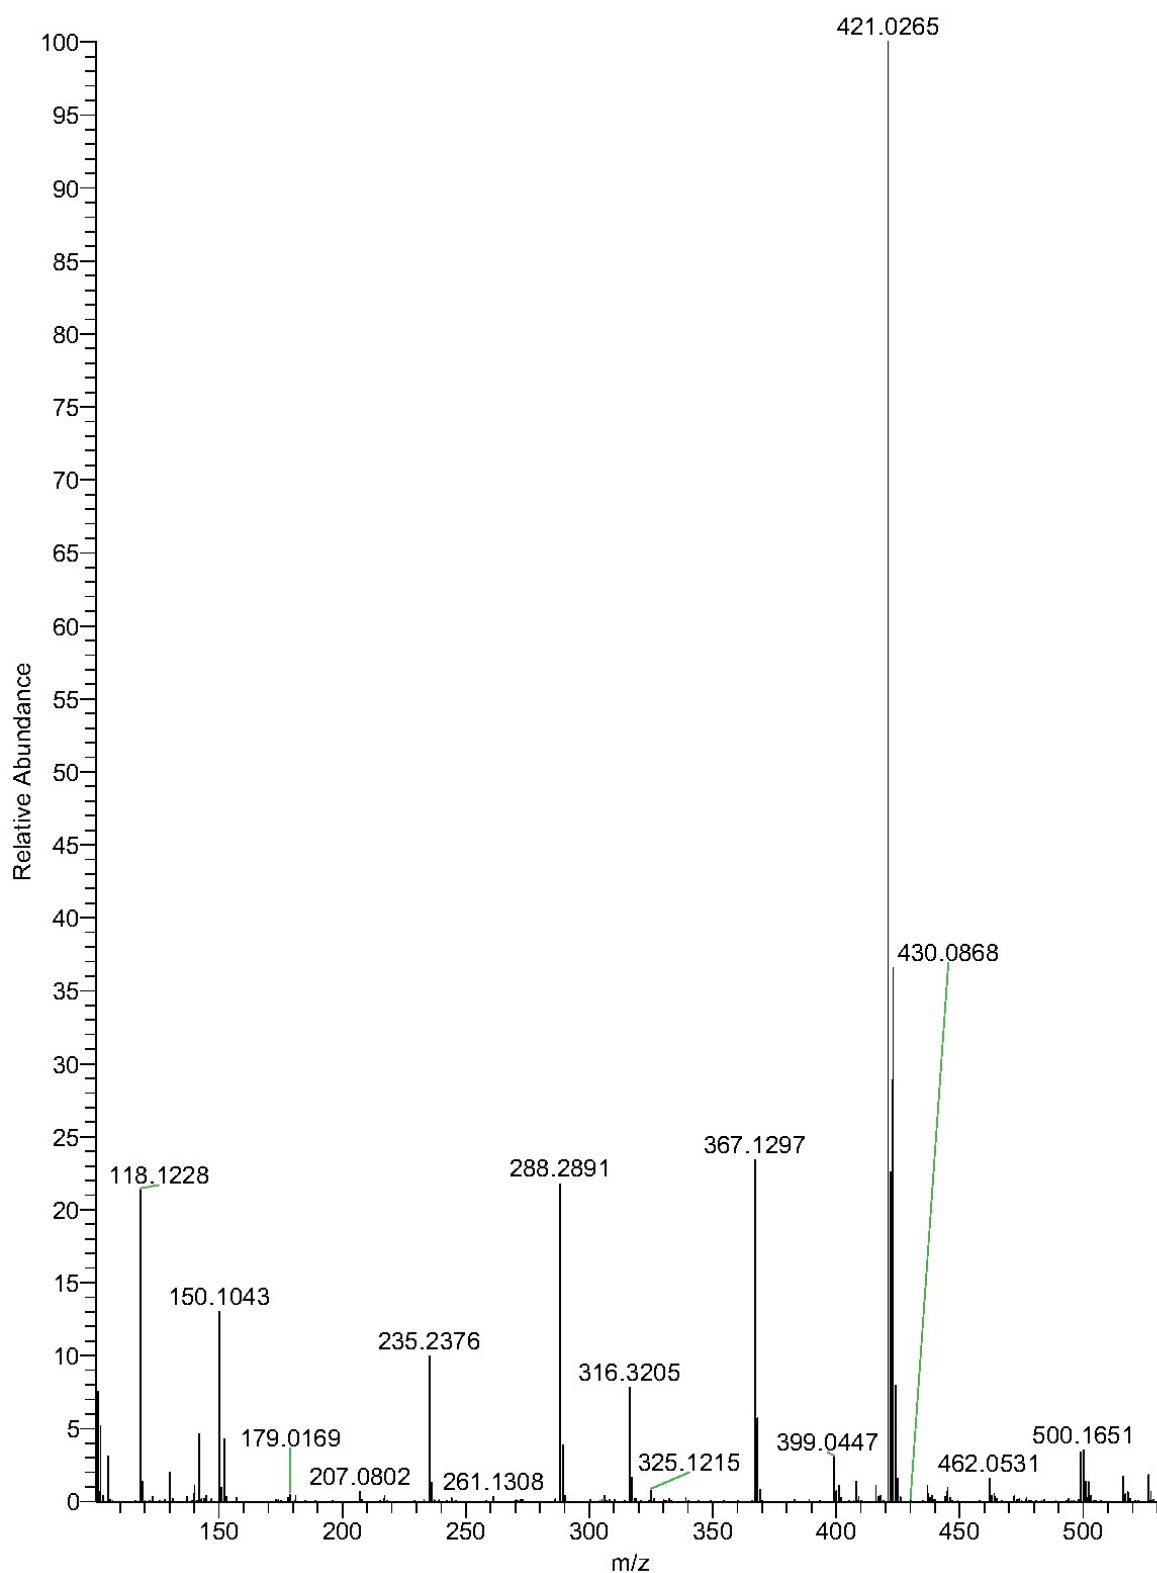

Mass Spectrum of Compound 7

FRUK | AHMED IAC-CH-09 #7-308 RT: 0.02-0.72 AV: 302 NL: 6.09E8  
T: FTMS + p ESI Full ms [100.0000-1000.0000]

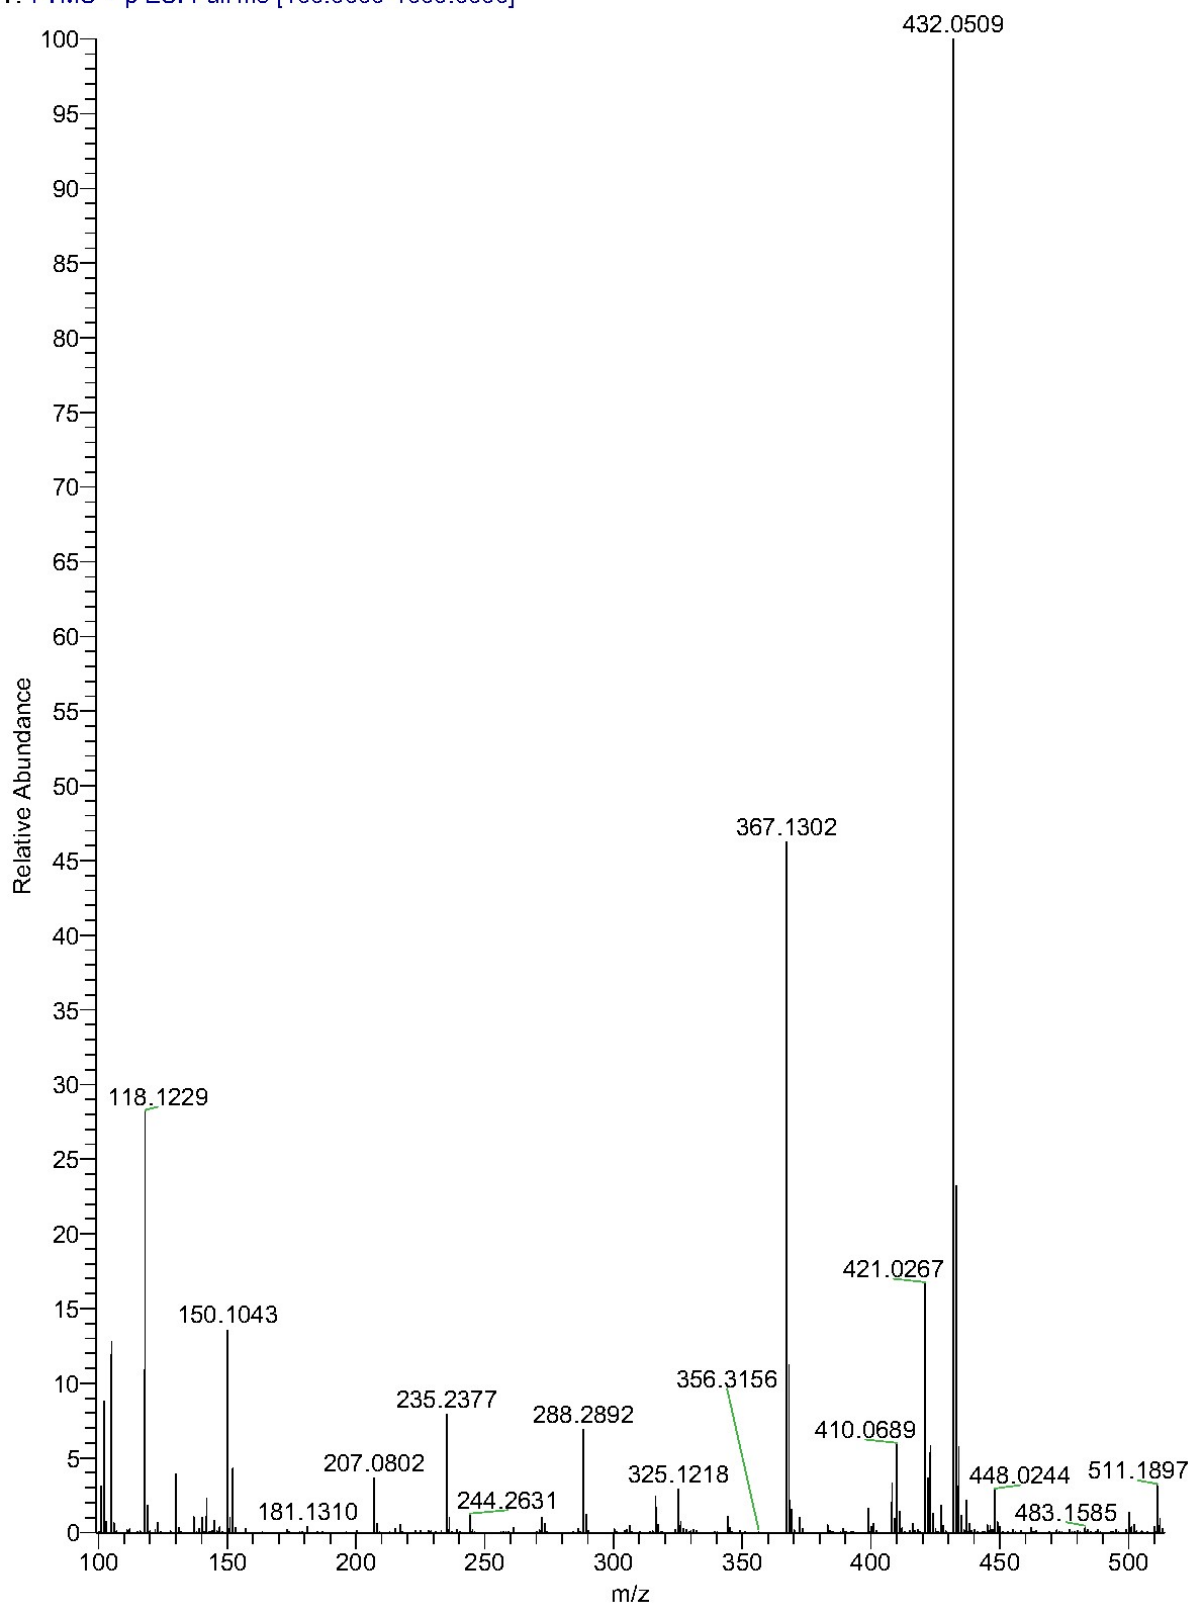

**NMR Spectra of the Newly Synthesized Compounds**

### <sup>1</sup>H-NMR Spectrum (400 MHz, CDCl<sub>3</sub>) of Compound 1

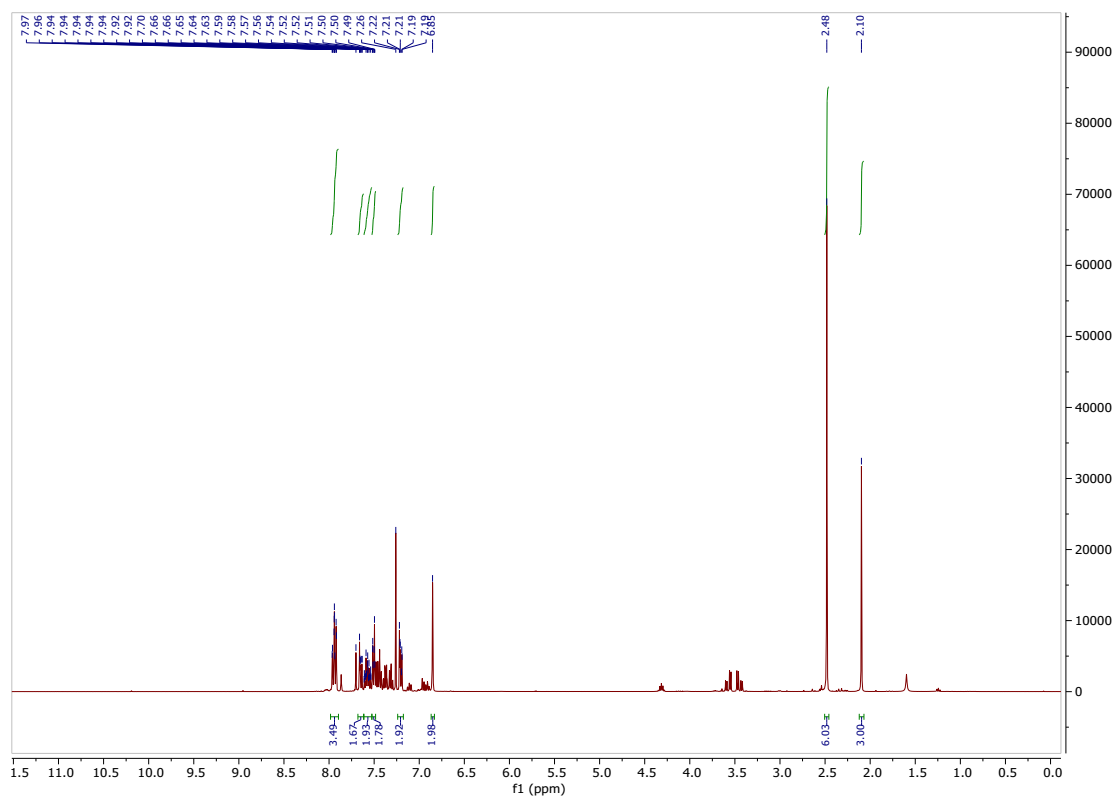

### <sup>13</sup>C-NMR Spectrum (101 MHz, CDCl<sub>3</sub>) of Compound 1

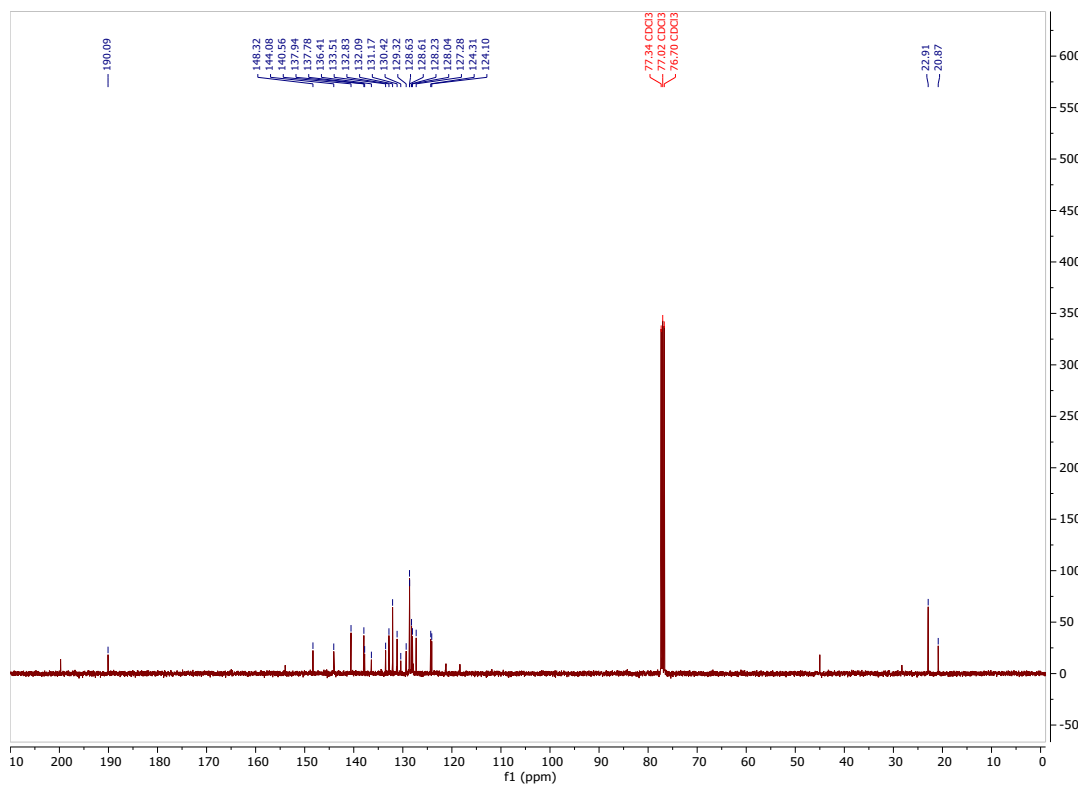

### <sup>1</sup>H-NMR Spectrum (400 MHz, CDCl<sub>3</sub>) of Compound 2

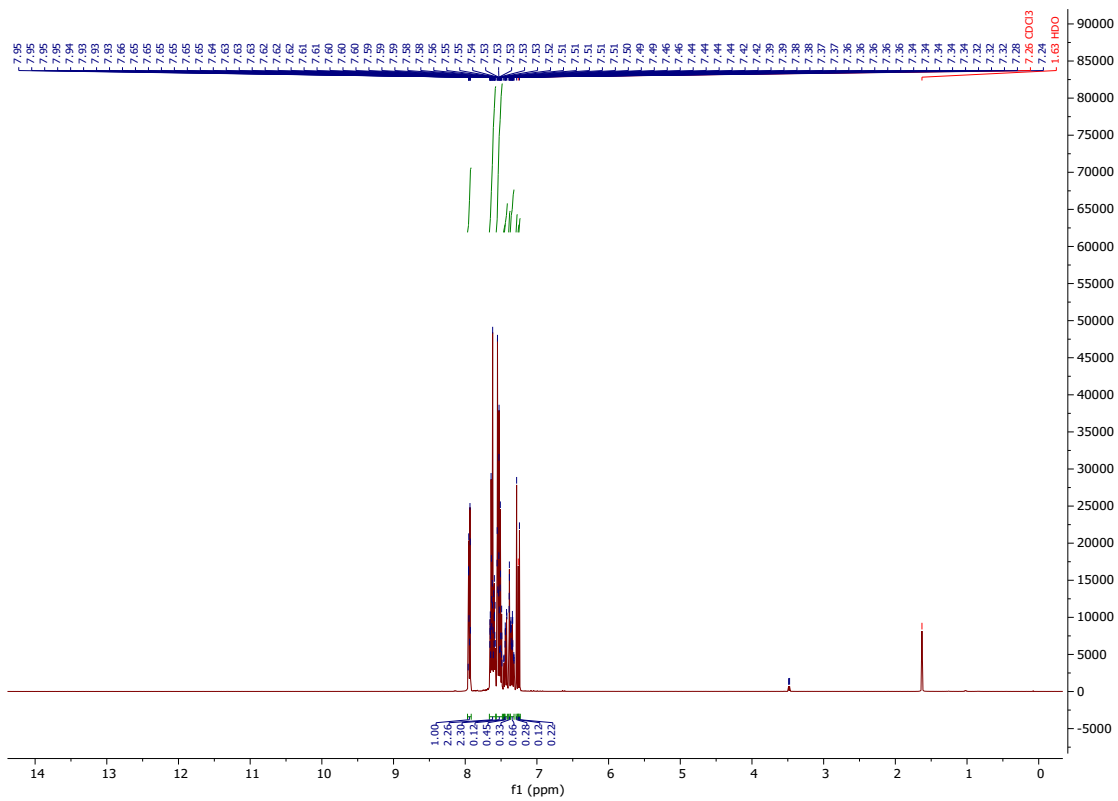

**<sup>13</sup>C-NMR Spectrum (101 MHz, CDCl<sub>3</sub>) of Compound 2**

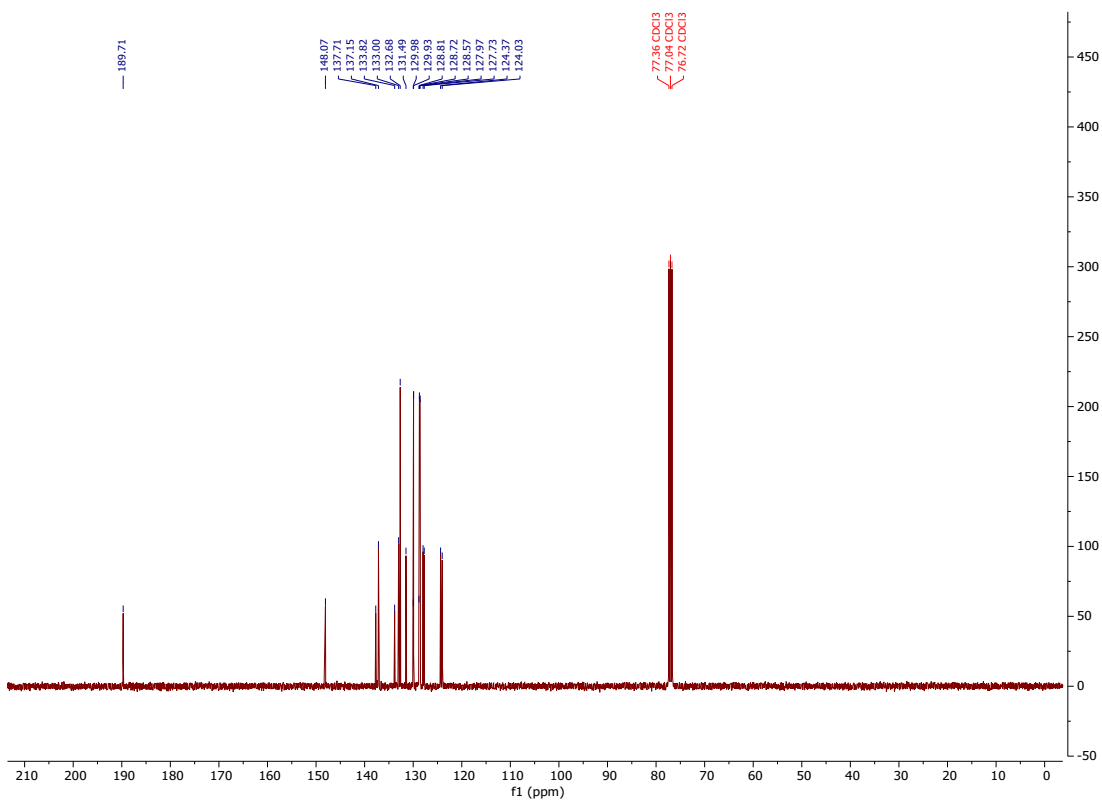

**<sup>1</sup>H-NMR Spectrum (600 MHz, CDCl<sub>3</sub>) of Compound 3**

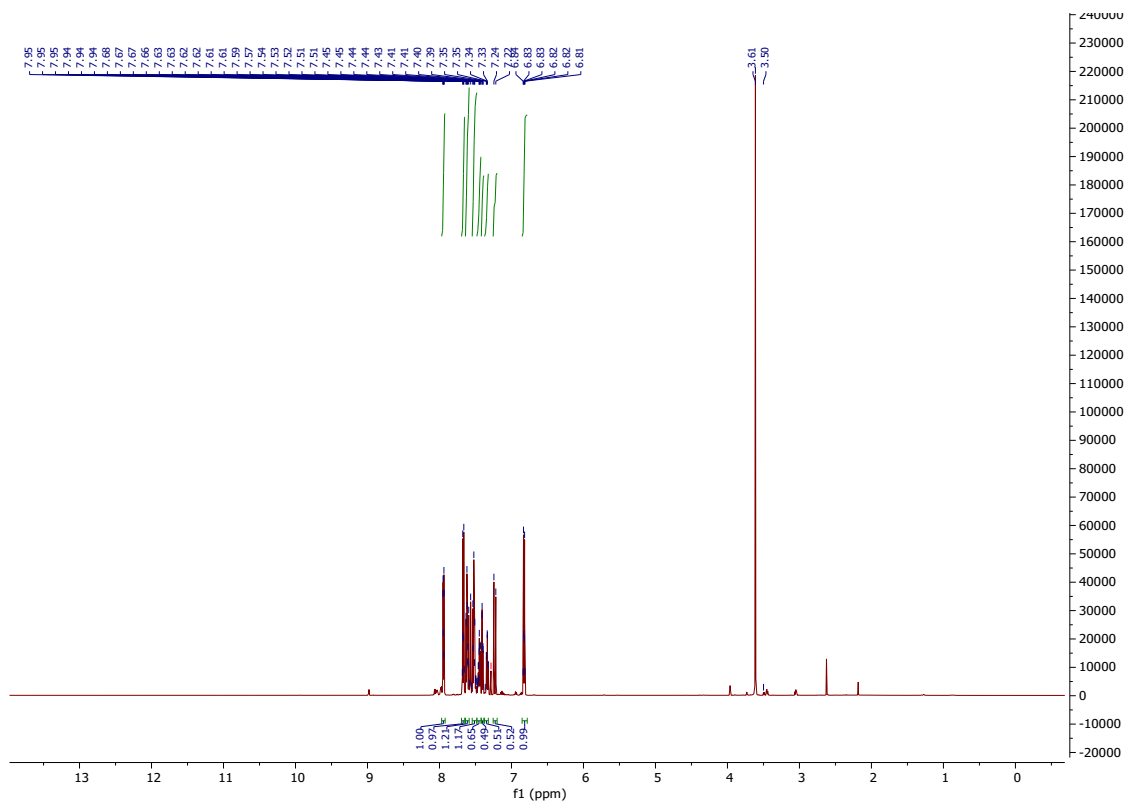

**<sup>13</sup>C-NMR Spectrum (151 MHz, CDCl<sub>3</sub>) of Compound 3**

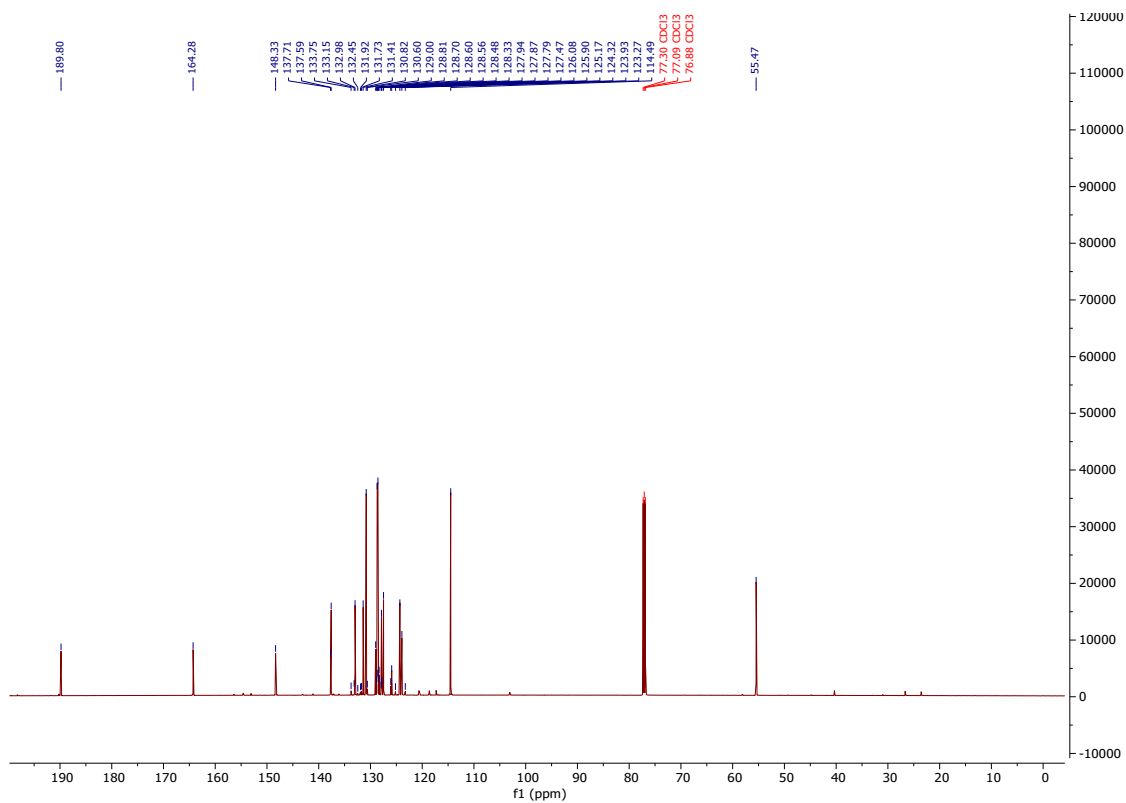



# <sup>1</sup>H-NMR Spectrum (400 MHz, CDCl<sub>3</sub>) of Compound 5

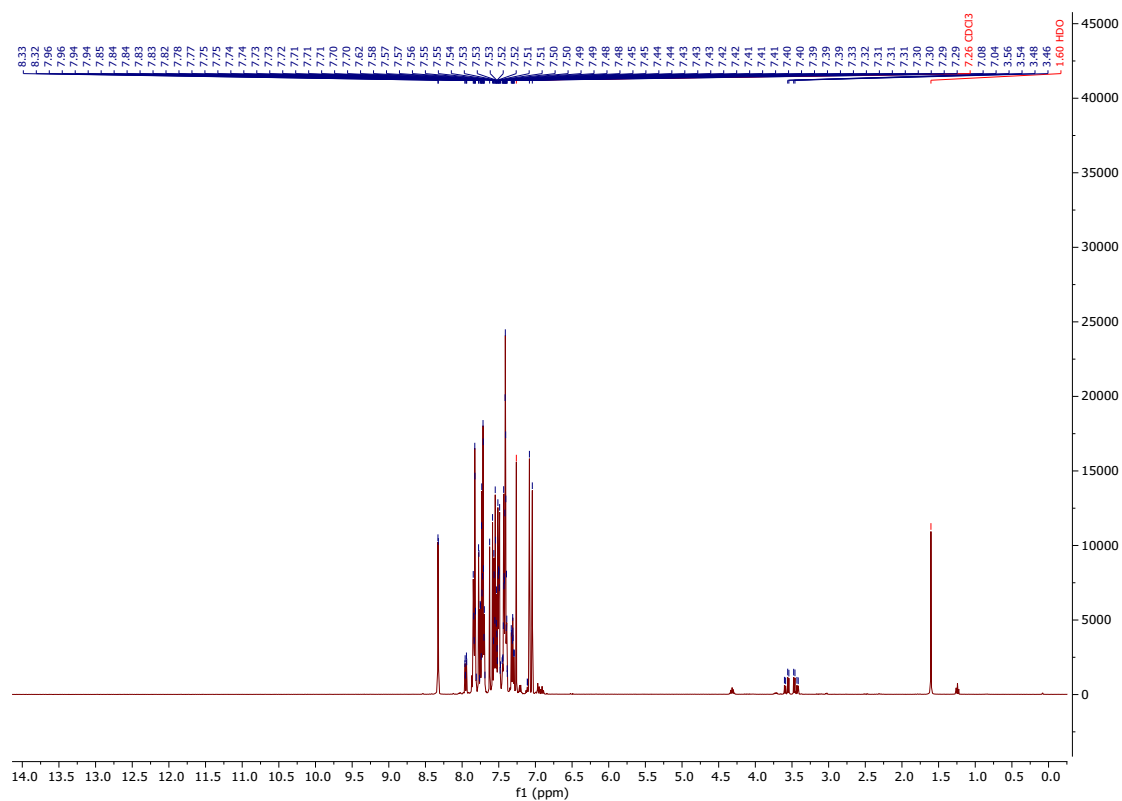

# <sup>13</sup>C-NMR Spectrum (101 MHz, CDCl<sub>3</sub>) of Compound 5

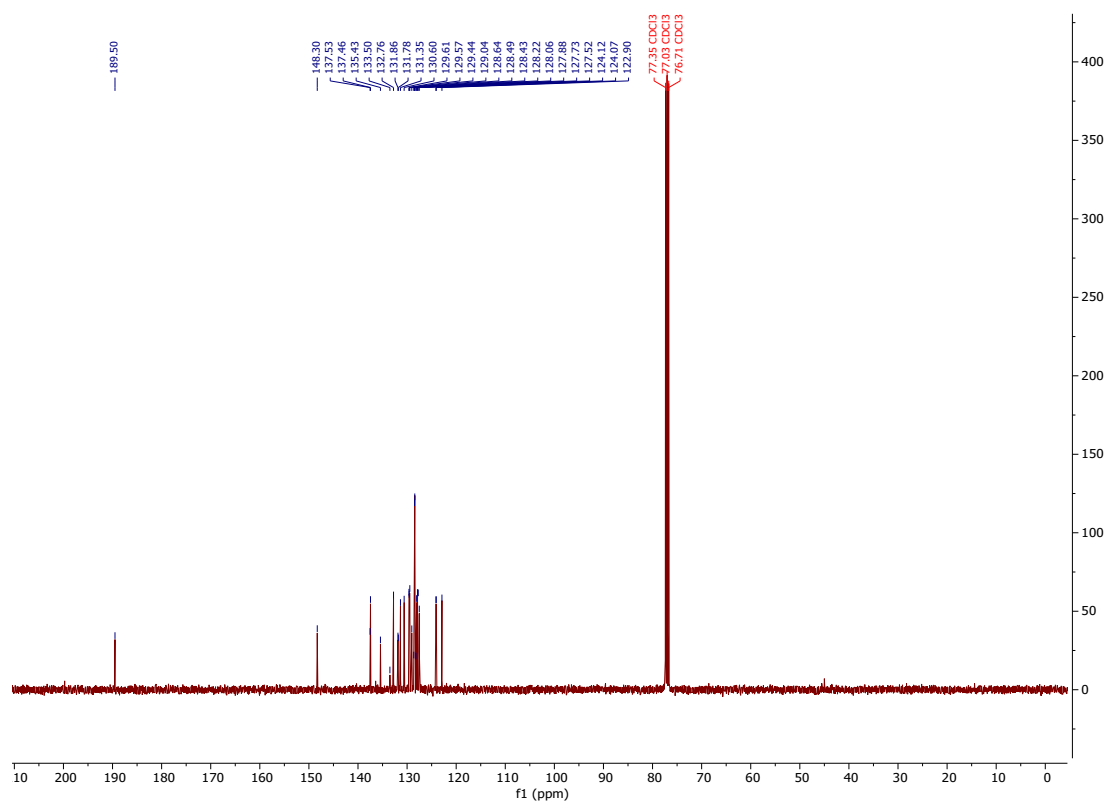



### <sup>1</sup>H-NMR Spectrum (400 MHz, CDCl<sub>3</sub>) of Compound 7

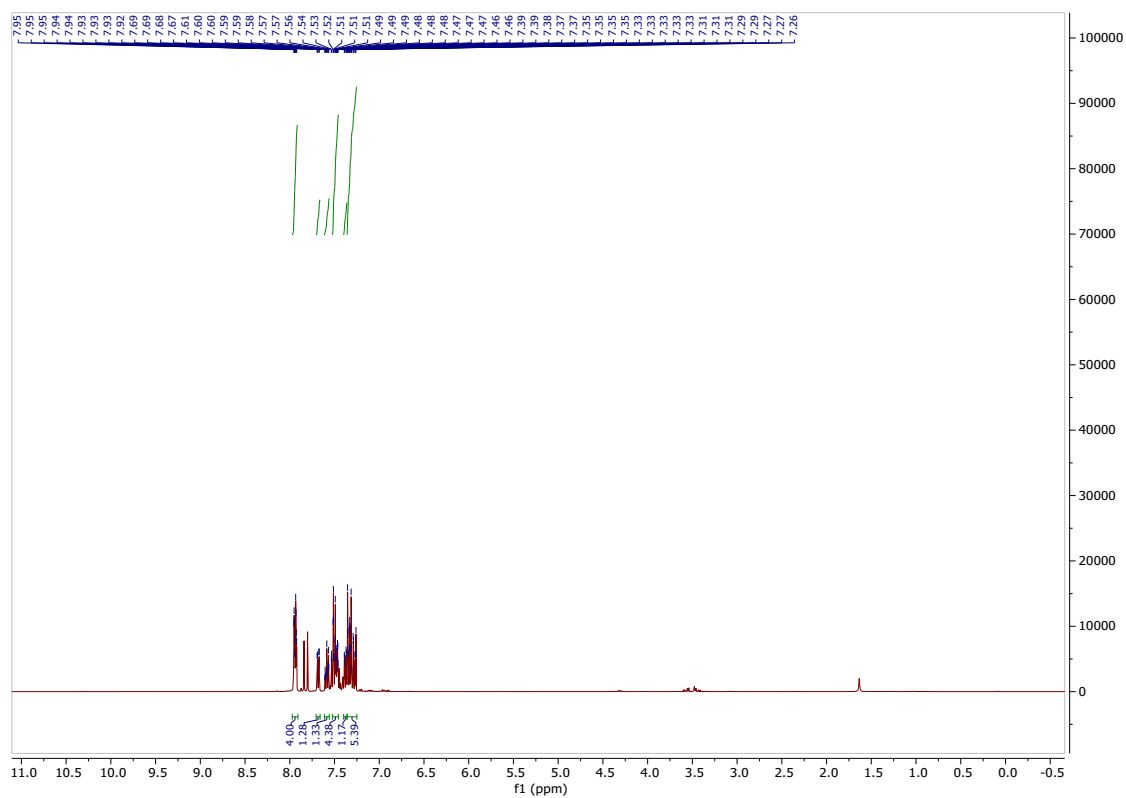

### <sup>13</sup>C-NMR Spectrum (101 MHz, CDCl<sub>3</sub>) of Compound 7

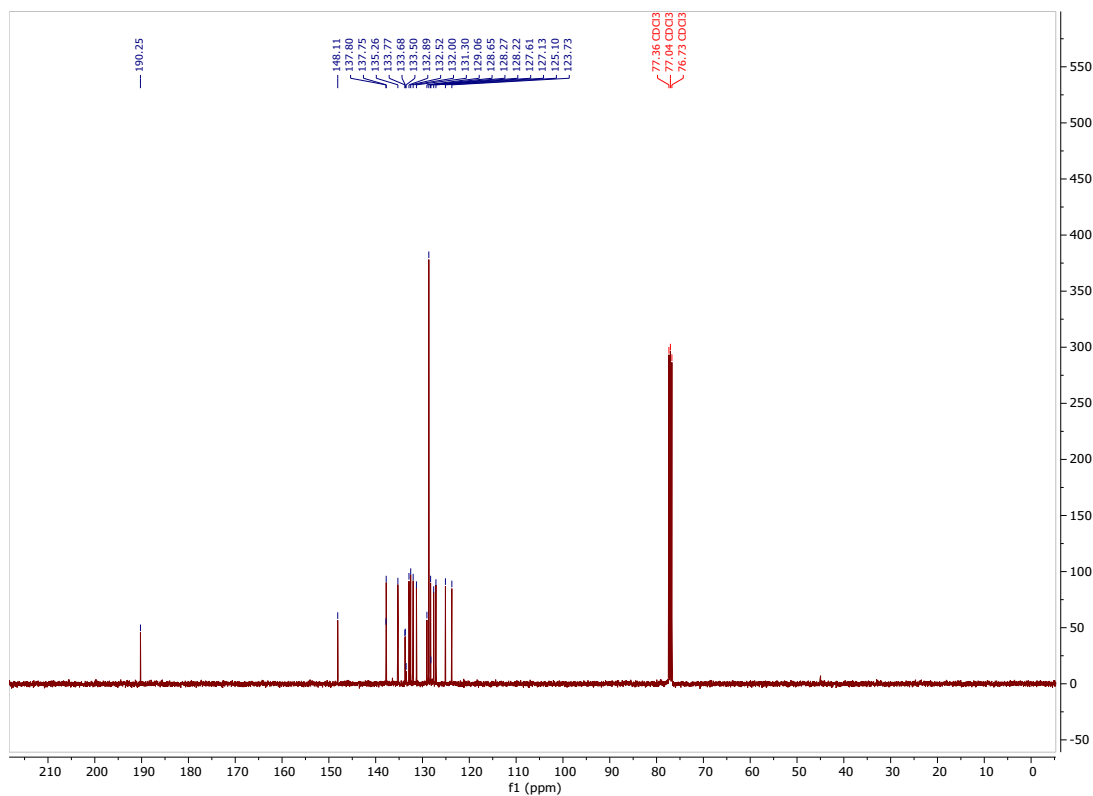

Supplement: d6ra02588a1.pdf [file d6ra02588a1.pdf]
